# Structure in the variability of the basic reproductive number ( $R_0$ ) for Zika epidemics in the Pacific islands

Clara Champagne <sup>\*1,2</sup>, David Georges Salthouse<sup>1</sup>, Richard Paul<sup>3,4</sup>, Van-Mai  
Cao-Lormeau<sup>5</sup>, Benjamin Roche<sup>6</sup> and Bernard Cazelles <sup>†1,6</sup>

<sup>1</sup>IBENS, UMR 8197 CNRS-ENS Ecole Normale Supérieure, 46 rue d'Ulm, 75230 Paris, France

<sup>2</sup>Centre de Recherche en Economie et Statistiques (CREST), 15 boulevard Gabriel Péri, 92245 Malakoff cedex, France

<sup>3</sup>Institut Pasteur, Unité de Génétique Fonctionnelle des Maladies Infectieuses, Department of Genomes and Genetics,  
F-75724 Paris cedex 15, France

<sup>4</sup>Centre National de la Recherche Scientifique, Unité de Recherche associée 3012, Paris, France

<sup>5</sup>Unit of Emerging Infectious Diseases, Institut Louis Malardé, 98713 Papeete, Tahiti, French Polynesia

<sup>6</sup>International Center for Mathematical and Computational Modeling of Complex Systems (UMMISCO), UMI 209  
UPMC/IRD, Bondy cedex, France

---

\*champagn@biologie.ens.fr

†cazelles@biologie.ens.fr

## 13 Abstract

14 Before the outbreak that reached the Americas in 2015, Zika virus (ZIKV) circulated in  
 15 Asia and the Pacific: these past epidemics can be highly informative on the key parameters  
 16 driving virus transmission, such as the basic reproduction number ( $R_0$ ). We compare  
 17 two compartmental models with different mosquito representations, using surveillance  
 18 and seroprevalence data for several ZIKV outbreaks in Pacific islands (Yap, Micronesia  
 19 2007, Tahiti and Moorea, French Polynesia 2013-2014, New Caledonia 2014). Models are  
 20 estimated in a stochastic framework with state-of-the-art Bayesian techniques.  $R_0$  for the  
 21 Pacific ZIKV epidemics is estimated between 1.5 and 4.1, the smallest islands displaying  
 22 higher and more variable values. This relatively low range of  $R_0$  suggests that intervention  
 23 strategies developed for other flaviviruses should enable as, if not more effective control  
 24 of ZIKV. Our study also highlights the importance of seroprevalence data for precise  
 25 quantitative analysis of pathogen propagation, to design prevention and control strategies.

26 In May 2015, the first local cases of Zika were recorded in Brazil and by December of the  
27 same year the number of cases had surpassed 1.5 million. On February 2016, the World  
28 Health Organization declared Zika as a public health emergency of international concern<sup>1</sup>  
29 and in March 2016, local transmission of Zika was recognized in 34 countries. Previously  
30 the Zika virus had circulated in Africa and Asia but only sporadic human cases had been  
31 reported. In 2007 the outbreak on Yap (Micronesia) was the first Zika outbreak outside  
32 Africa and Asia.<sup>2</sup> Since, Zika outbreaks have been also reported in French Polynesia and  
33 in New Caledonia<sup>3;4</sup> between 2013 and 2014 and subsequently, there have been cases of  
34 Zika disease in the Cook Islands, the Solomon Islands, Samoa, Vanuatu, and Easter Island  
35 (Chile) (see Fig. 1 in reference<sup>5</sup>).

36  
37 Zika virus (ZIKV) is a flavivirus, mostly transmitted via the bites of infected *Aedes*  
38 mosquitoes, although non-vector-borne transmission has been documented (sexual and  
39 maternofetal transmission, laboratory contamination, transmission through transfusion).<sup>6</sup>  
40 The most common clinical manifestations include rash, fever, arthralgia, and conjunctivitis<sup>6</sup>  
41 but a large proportion of infections are asymptomatic or trigger mild symptoms that can  
42 remain unnoticed. Nevertheless, the virus may be involved in many severe neurological  
43 complications, including Guillain-Barre syndrome<sup>7</sup> and microcephaly in newborns.<sup>8</sup> These  
44 complications and the impressive speed of its geographically propagation make the Zika  
45 pandemic a public health threat.<sup>1</sup> This reinforces the urgent need to characterize the different  
46 facets of virus transmission and to evaluate its dispersal capacity. We address this here by  
47 estimating the key parameters of ZIKV transmission, including the basic reproduction  
48 number ( $R_0$ ), based on previous epidemics in the Pacific islands.

49  
50 Defined as the average number of secondary cases caused by one typical infected individual  
51 in an entirely susceptible population, the basic reproduction number ( $R_0$ ) is a central  
52 parameter in epidemiology used to quantify the magnitude of ongoing outbreaks and

it provides insight when designing control interventions.<sup>9</sup> It is nevertheless complex to estimate<sup>9;10</sup>, and therefore, care must be taken when extrapolating the results obtained in a specific setting, using a specific mathematical model. In the present study, we explore the variability of  $R_0$  using two state-of-the-art models in several settings that had Zika epidemics in different years and that vary in population size (Yap, Micronesia 2007, Tahiti and Moorea, French Polynesia 2013-2014, and New Caledonia 2014). These three countries were successively affected by the virus, resulting in the first significant human outbreaks and they differ in several ways, including population size and location specific features. Hence, the comparison of their parameter estimates can be highly informative on the intrinsic variability of  $R_0$ . For each setting, we compare two compartmental models using different parameters defining the mosquito populations. Both models are considered in a stochastic framework, a necessary layer of complexity given the small population size and state-of-the-art Bayesian inference techniques<sup>11</sup> are used for parameter estimation.

## Results

We use mathematical transmission models and data from surveillance systems and seroprevalence surveys for several ZIKV outbreaks in Pacific islands (Yap, Micronesia 2007<sup>2</sup>, Tahiti and Moorea, French Polynesia 2013-2014<sup>12-14</sup>, New Caledonia 2014<sup>15</sup>) to quantify the ZIKV transmission variability.

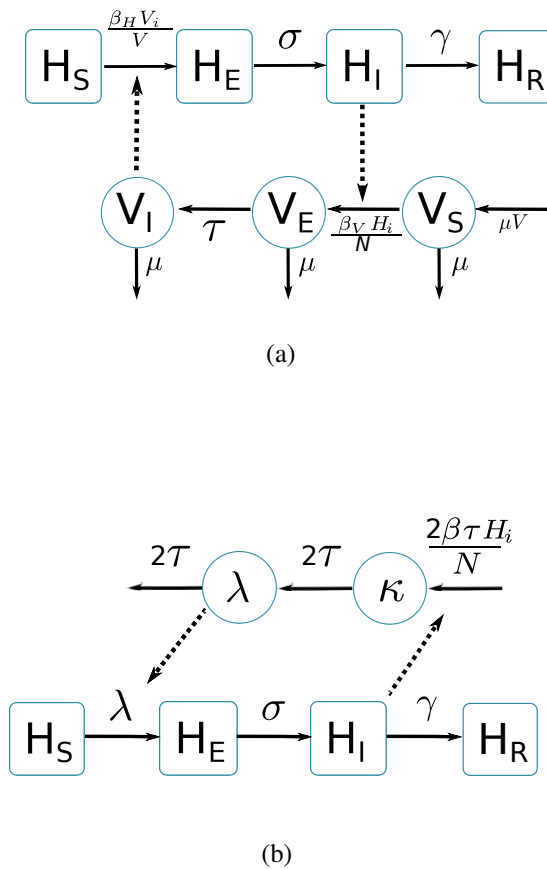

**Figure 1 – Graphical representation of compartmental models.** Squared boxes and circles correspond respectively to human and vector compartments. Plain arrows represent transitions from one state to the next. Dashed arrows indicate interactions between humans and vectors. a) Pandey model.<sup>16</sup>  $H_S$  susceptible individuals;  $H_E$  infected (not yet infectious) individuals;  $H_I$  infectious individuals;  $H_R$  recovered individuals;  $\sigma$  is the rate at which  $H_E$ -individuals move to infectious class  $H_I$ ; infectious individuals ( $H_I$ ) then recover at rate  $\gamma$ ;  $V_S$  susceptible vectors;  $V_E$  infected (not yet infectious) vectors;  $V_I$  infectious vectors;  $V$  constant size of total mosquito population;  $\tau$  is the rate at which  $V_E$ -vectors move to infectious class  $V_I$ ; vectors die at rate  $\mu$ . b) Laneri model.<sup>17</sup>  $H_S$  susceptible individuals;  $H_E$  infected (not yet infectious) individuals;  $H_I$  infectious individuals;  $H_R$  recovered individuals;  $\sigma$  is the rate at which  $H_E$ -individuals move to infectious class  $H_I$ ; infectious individuals ( $H_I$ ) then recover at rate  $\gamma$ ; implicit vector-borne transmission is modeled with the compartments  $\kappa$  and  $\lambda$ ;  $\lambda$  current force of infection;  $\kappa$  latent force of infection reflecting the exposed state for mosquitoes during the extrinsic incubation period;  $\tau$  is the transition rate associated to the extrinsic incubation period.

Two compartmental models with vector-borne transmission are compared (cf. Figure 1). Both models use a Susceptible-Exposed-Infected-Resistant (SEIR) framework to describe the virus transmission in the human population, but differ in their representation of the mosquito population. Figure 1.a. is a schematic representation derived from Pandey et al.<sup>16</sup>

and formulates explicitly the mosquito population, with a Susceptible-Exposed-Infected (SEI) dynamic to account for the extrinsic incubation period (time taken for viral dissemination within the mosquito).

By contrast, in the second model (Figure 1.b.) based on Laneri et al.<sup>17</sup> the vector is modeled implicitly: the two compartments  $\kappa$  and  $\lambda$  do not represent the mosquito population but the force of infection for vector to human transmission. This force of infection passes through two successive stages in order to include the delay associated with the extrinsic incubation period:  $\kappa$  stands for this latent phase of the force of infection whereas  $\lambda$  corresponds directly to the rate at which susceptible humans become infected.

The basic reproduction number of the models ( $R_0$ ) is calculated using the next Generation Matrix method:<sup>9</sup>

$$R_0^{Pandey} = \sqrt{\frac{\beta_H \beta_V \tau}{\gamma \mu (\mu + \tau)}}$$

$$R_0^{Laneri} = \sqrt{\frac{\beta}{\gamma}}$$

In addition, we consider that only a fraction  $\rho$  of the total population is involved in the epidemic, due to spatial heterogeneity, immuno-resistance, or cross-immunity. For both models we define  $N = \rho \cdot H$  with H the total size of the population reported by census.

The dynamics of ZIKV transmission in these islands is highly influenced by several sources of uncertainties. In particular, the small population size (less than 7,000 inhabitants in Yap) leads to high variability in transmission rates. Therefore all these models are simulated in a discrete stochastic framework (Poisson with stochastic rates<sup>18</sup>), to take this phenomenon into account. Stochasticity requires specific inference techniques : thus estimations are performed with PMCMC algorithm (particle Markov Chain Monte Carlo<sup>11</sup>).

---

100 Using declared Zika cases from different settings, the two stochastic models (Fig. 1) were  
101 fitted (Figs 2-3). These models allow us to describe the course of the observed number  
102 of cases and estimate the number of secondary cases generated,  $R_0$ . Our estimates of  $R_0$   
103 lie between 1.6 (1.5-1.7) and 3.2 (2.4-4.1) and vary notably with respect to settings and  
104 models (Figures 2-3 and Tables 1-2). Strikingly, Yap displays consistently higher values of  
105  $R_0$  in both models and in general, there is an inverse relationship between island size and  
106 both the value and variability of  $R_0$ . This phenomenon may be explained by the higher  
107 stochasticity and extinction probability associated with smaller populations and can also  
108 reflect the information contained in the available data. However, the two highly connected  
109 islands in French Polynesia, Tahiti and Moorea, display similar values despite their differing  
110 sizes.

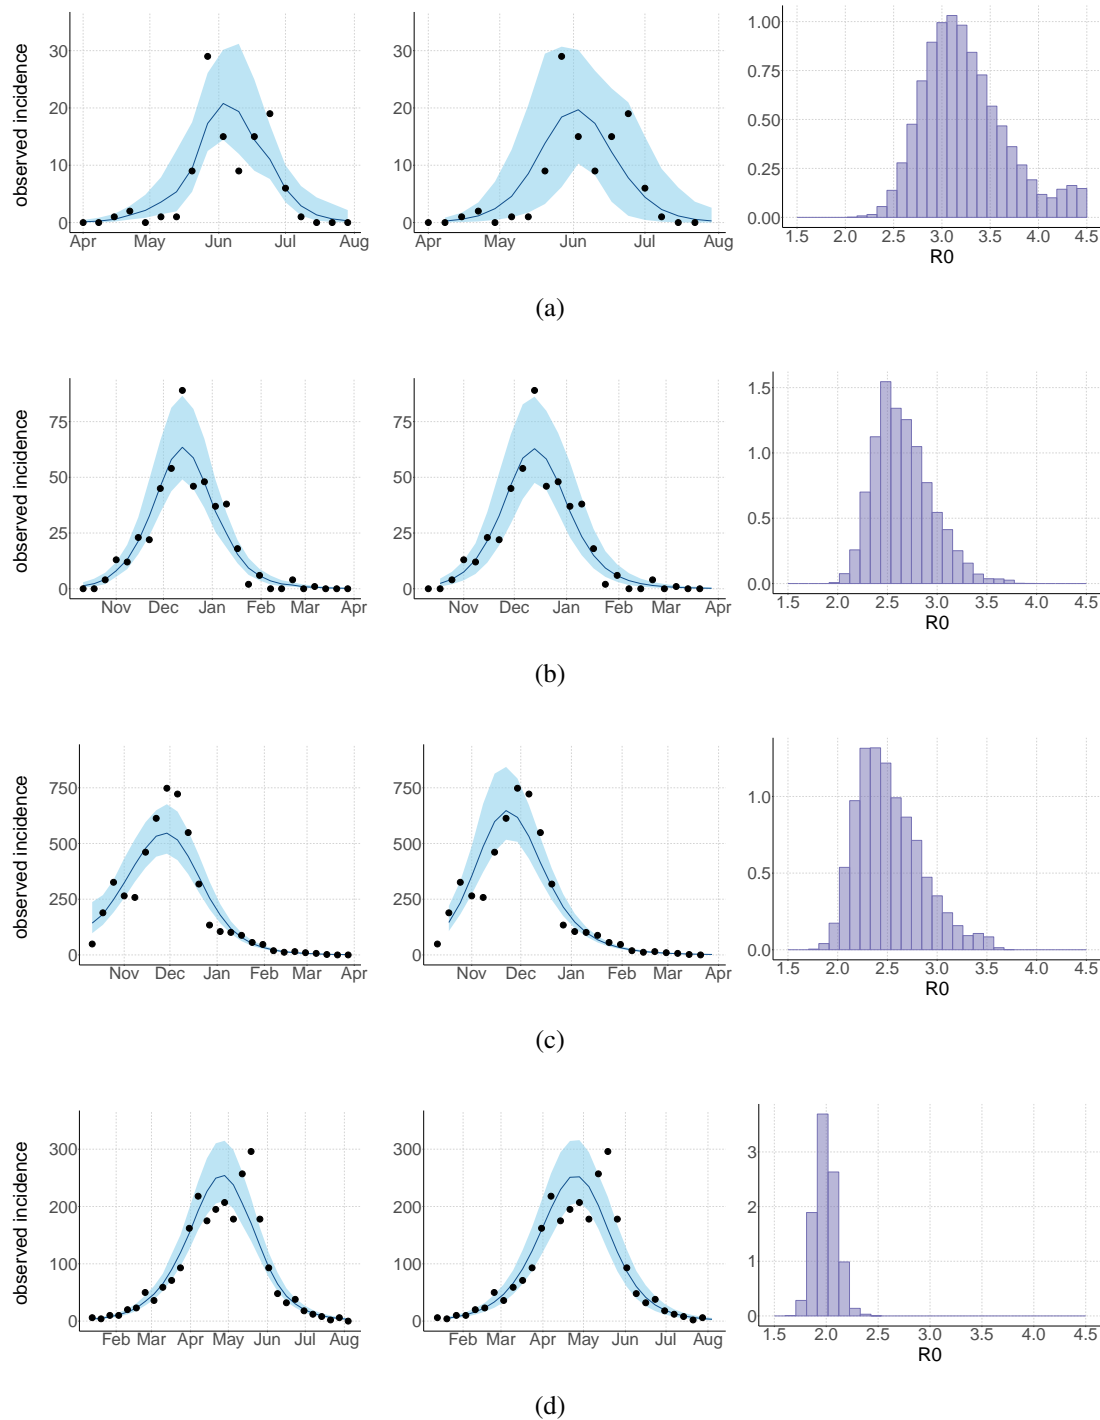

**Figure 2 – Results using the Pandey model.** Posterior median number of observed Zika cases (solid line), 95% credible intervals (shaded blue area) and data points (black dots). First column: particle filter fit. Second column: Simulations from the posterior density. Third column:  $R_0$  posterior distribution. a) Yap. b) Moorea. c) Tahiti. d) New Caledonia. The estimated seroprevalences at the end of the epidemic (with 95% credibility intervals) are: a) 73% (CI95: 68-77, observed 73%); b) 49% (CI95: 45-53, observed 49%); c) 49% (CI95: 45-53, observed 49%); d) 39% (CI95: 8-92). See Figure 4.



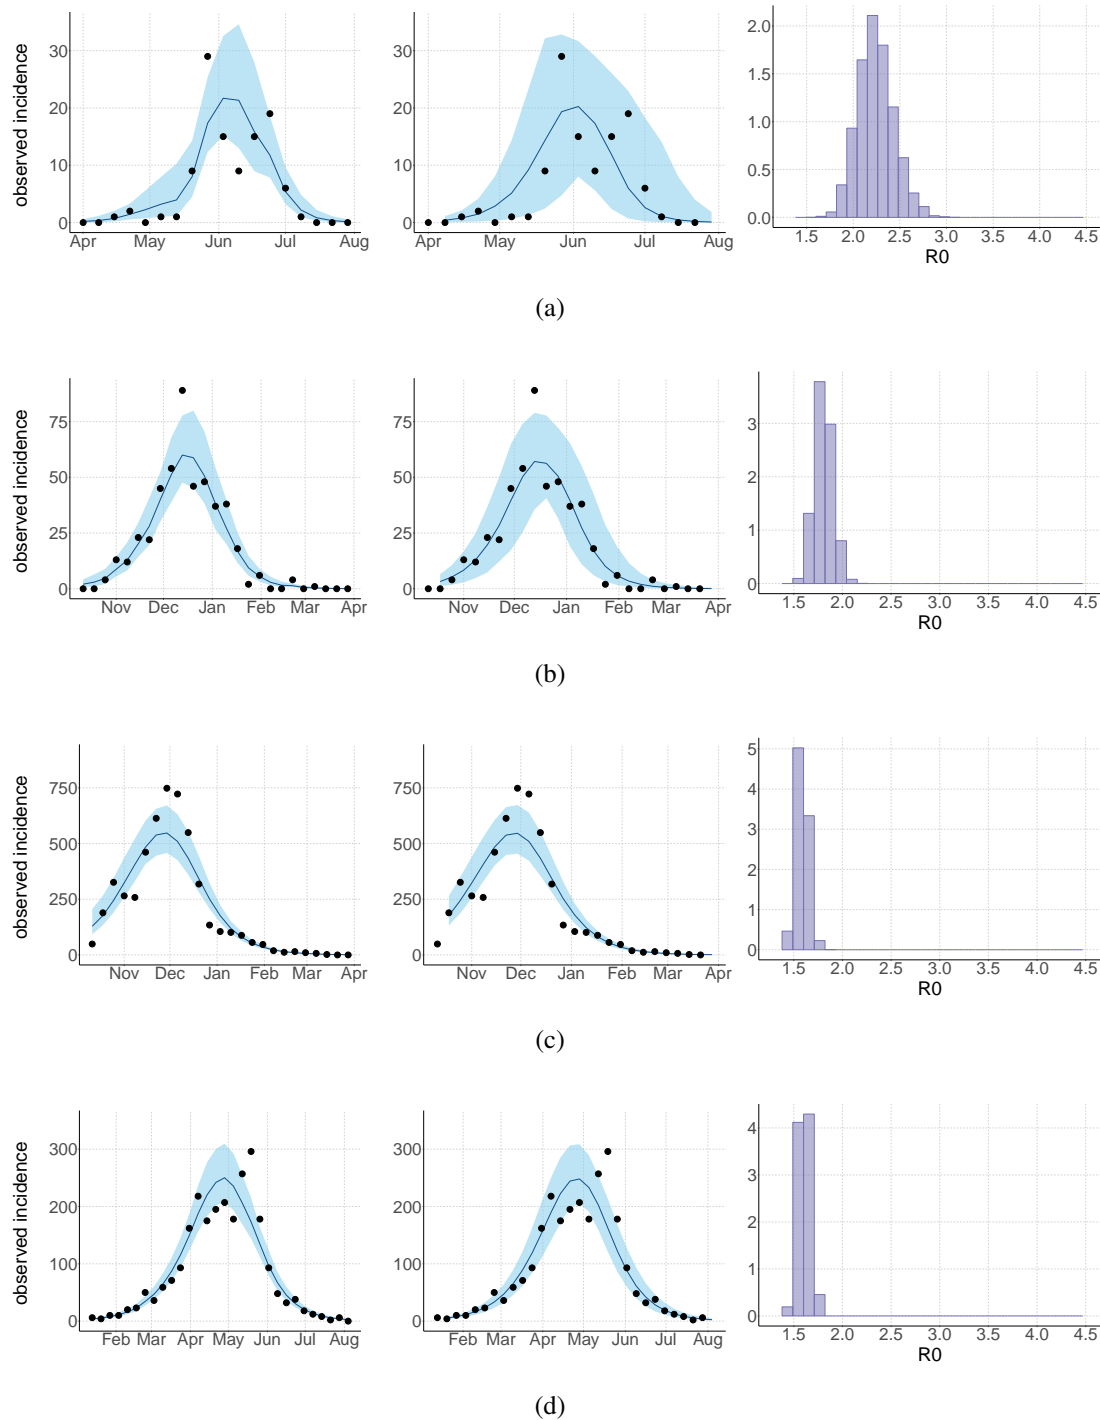

**Figure 3 – Results using the Laneri model.** Posterior median number of observed Zika cases (solid line), 95% credible intervals (shaded blue area) and data points (black dots). First column: particle filter fit. Second column: Simulations from the posterior density. Third column:  $R_0$  posterior distribution. a) Yap. b) Moorea. c) Tahiti. d) New Caledonia. The estimated seroprevalences at the end of the epidemic (with 95% credibility intervals) are: a) 72% (CI95: 68-77, observed 73%); b) 49% (CI95: 45-53, observed 49%); c) 49% (CI95: 45-53, observed 49%); d) 65% (CI95: 24-91). See Figure 5.

Regarding model variability,  $R_0$  estimates are always higher and coarser with the Pandey model than with the Laneri model (cf. Tables 1-2). The Pandey model has two additional estimated parameters (in particular, the mosquito lifespan), which can explain the higher variability of the output. It is worth noting that these parameters are very sensitive (see Materials and methods). The difference in  $R_0$  may also be linked to the difference in the estimated initial number of infected individuals ( $H_{I0}$ ), which is higher in the Laneri model than in the Pandey model. Because of the high proportion of asymptomatic cases (the ratio of asymptomatic:symptomatic is estimated to be 1:1.3, V.-M Cao-Lormeau personal communication), it is hard to determine which scenario is more realistic, the time between introduction of the disease into the island and the first reported symptomatic case being unknown in most settings.

| PANDEY MODEL                                   |               | Yap                   | Moorea                | Tahiti                | New Caledonia        |
|------------------------------------------------|---------------|-----------------------|-----------------------|-----------------------|----------------------|
| Population size                                | $H$           | 6,892                 | 16,200                | 178,100               | 268,767              |
| Basic reproduction number                      | $R_0$         | 3.2 (2.4 – 4.1)       | 2.6 (2.2 – 3.3)       | 2.5 (2.0 – 3.3)       | 2.0 (1.8 – 2.2)      |
| Observation rate                               | $r$           | 0.024 (0.018 – 0.031) | 0.058 (0.047 – 0.071) | 0.060 (0.048 – 0.072) | 0.029 (0.009 – 0.10) |
| Fraction of population involved                | $\rho$        | 74% (69-79)           | 50% (46-54)           | 50% (46-54)           | 34% (8-91)           |
| Initial number of infected individuals         | $H_{I0}$      | 2 (1-8)               | 5 (0-21)              | 304 (16-1145)         | 37 (1-386)           |
| Infectious period in human (days)              | $\gamma^{-1}$ | 5.2 (4.0 – 6.5)       | 5.2 (4.0 – 6.6)       | 5.2 (4.0 – 6.5)       | 5.4 (4.1 – 6.7)      |
| Extrinsic incubation period in mosquito (days) | $\tau^{-1}$   | 10.5 (8.6 – 12.4)     | 10.5 (8.6 – 12.4)     | 10.4 (8.5 – 12.5)     | 10.7 (8.9 – 12.5)    |
| Mosquito lifespan (days)                       | $\mu^{-1}$    | 15.4 (11.8 – 19.3)    | 15.3 (11.6 – 19.2)    | 14.9 (10.9 – 18.8)    | 15.3 (11.5 – 19.4)   |

**Table 1 – Parameter estimations for the Pandey model.** Posterior median (95% credible intervals). All the posterior parameter distributions are presented in Figures 6-9.

| LANERI MODEL                                   |               | Yap                  | Moorea                | Tahiti                | New Caledonia         |
|------------------------------------------------|---------------|----------------------|-----------------------|-----------------------|-----------------------|
| Population size                                | $H$           | 6,892                | 16,200                | 178,100               | 268,767               |
| Basic reproduction number                      | $R_0$         | 2.2 (1.9 – 2.6)      | 1.8 (1.6 – 2.0)       | 1.6 (1.5 – 1.7)       | 1.6 (1.5 – 1.7)       |
| Observation rate                               | $r$           | 0.02 (0.018 – 0.032) | 0.057 (0.047 – 0.071) | 0.057 (0.048 – 0.068) | 0.015 (0.009 – 0.033) |
| Fraction of population involved                | $\rho$        | 73% (69 – 78)        | 51% (46 – 54)         | 54% (49 – 59)         | 70% (31 – 100)        |
| Initial number of infected individuals         | $Hi_0$        | 2 (1 – 10)           | 9 (1 – 28)            | 667 (22 – 1570)       | 82 (2 – 336)          |
| Infectious period in human (days)              | $\gamma^{-1}$ | 5.3 (4.0 – 6.6)      | 5.2 (4.0 – 6.6)       | 5.1 (4.0 – 6.5)       | 5.4 (4.0 – 6.7)       |
| Extrinsic incubation period in mosquito (days) | $\tau^{-1}$   | 10.6 (8.8 – 12.7)    | 10.6 (8.6 – 12.6)     | 10.5 (8.5 – 12.4)     | 10.8 (8.9 – 12.7)     |

**Table 2 – Parameter estimations for the Laneri model.** Posterior median (95% credible intervals). All the posterior parameter distributions are presented in Figures 10-13.

For the duration of infectious and intrinsic incubation (in human) and extrinsic incubation (in mosquito) periods, the posterior density resembles the informative prior (cf. Figures 6-13), indicating the models' incapacity to identify properly these parameters without more informative data. Moreover, these parameters have a clear sensitivity (see Materials and methods) and precise field measures are therefore crucial for reliable model predictions.

The fraction  $\rho$  of the population involved in the epidemic and the observation rate  $r$  display very large credible intervals when seroprevalence is unknown (New Caledonia). They are highly correlated with one another (cf. Figures 17 and 21) and therefore unidentifiable without precise information on seroprevalence.

## Discussion

The reproduction number  $R_0$  is a key parameter in epidemiology that characterizes the epidemic dynamics and the initial spread of the pathogen at the start of an outbreak in a susceptible population.  $R_0$  can be used to inform public health authorities on the level of risk posed by an infectious disease, vaccination strategy, and the potential effects of control interventions<sup>19</sup>. In the light of the potential public health crisis generated by the international propagation of ZIKV, characterization of the potential transmissibility of this

139 pathogen is crucial for predicting epidemic size, rate of spread and efficacy of intervention.

140

141 Using data from both surveillance systems and seroprevalence surveys in four different  
 142 geographical settings across the Pacific,<sup>2;12–15</sup> we have estimated the basic reproductive  
 143 number  $R_0$  (see Figs 2-3 and Tables 1-2). Our estimate of  $R_0$  obtained by inference based  
 144 on Particle MCMC<sup>11</sup> has values in the range 1.6 (1.5-1.7) - 3.2 (2.4-4.1). Our  $R_0$  estimates  
 145 vary notably across settings. Lower and finer  $R_0$  values are found in larger islands. This  
 146 phenomenon can at least in part be explained by large spatial heterogeneities and higher  
 147 demographic stochasticity for islands with smaller populations, as well as the influence  
 148 of stochasticity on biological and epidemiological processes linked to virus transmission.  
 149 This phenomenon can also be specific to the selection of the studied island or can reflect  
 150 a highly clustered geographical pattern, the global incidence curve being the smoothed  
 151 overview of a collection of more explosive small size outbreaks. However, it is notable that  
 152 the two French Polynesian islands yield similar estimates of  $R_0$  despite differing population  
 153 sizes. Indeed, other important factors differ among French Polynesia, New Caledonia and  
 154 Yap, such as the human genetic background and their immunological history linked to  
 155 the circulation of others arboviruses. Moreover, whilst both New Caledonia and French  
 156 Polynesia populations were infected by the same ZIKV lineage and transmitted by the same  
 157 principle vector species, *Aedes aegypti*, the epidemic in Yap occurred much earlier with a  
 158 different ZIKV lineage<sup>20</sup> and vectored by a different mosquito species *Aedes hensilli*.<sup>21</sup> In  
 159 French Polynesia, the vector *Aedes polynesiensis* is also present and dominates in Moorea  
 160 with higher densities than in Tahiti. Finally, different vector control measures have been  
 161 conducted in the three countries.

162

163 To date, studies investigating Zika outbreaks in the Pacific have always estimated  $R_0$  using a  
 164 deterministic framework. Using a similar version of the Pandey model in French Polynesia,  
 165 Kucharski et al.<sup>22</sup> estimated  $R_0$  between 1.6 and 2.3 (after scaling to square root for

comparison) for Tahiti and between 1.8 and 2.9 in Moorea. These estimates are slightly lower and less variable than ours. This difference can be explained firstly by the chosen priors on mosquito parameters and secondly because our model includes demographic stochasticity. Moreover, they predicted a seroprevalence rate at the end of the epidemic of 95-97%, far from the 49% measured. In Yap island, a study<sup>23</sup> used a very detailed deterministic mosquito model, and estimated an  $R_0$  for Zika between 2.9 and 8. In this case, our lower and less variable estimates may come from the fact that our model is more parsimonious in the number of uncertain parameters, especially concerning the mosquito population. Finally, a third study<sup>24</sup> relied on another method for  $R_0$  calculation (based only on the early exponential growth rate of the epidemic) in French Polynesia as a whole and in Yap. Again, the obtained parameters are lower than ours in French Polynesia and higher in Yap. In all these studies a deterministic framework is used excluding the possibility of accounting for the high variability of biological and epidemiological processes exacerbated by the small size of the population. In these three studies, like in ours, it is worth noting that little insight is obtained regarding mosquito parameters. Posterior distribution mimics the chosen prior (cf. Figures 6-13). Both the simulation of the epidemics and the estimated  $R_0$  are highly sensitive to the choice of priors on mosquito parameters, for which precise field measures are rare.

In the absence of sufficient data, the modeling of mosquito-borne pathogen transmission is a difficult task due to non-linearity and non-stationarity of the involved processes.<sup>25</sup> This work has then several limitations. First, our study is limited by the completeness and quality of the data, with regard to both incidence and seroprevalence, but, above all, by the scarcity of information available on mosquitoes. Incidence data is aggregated at the island scale and cannot disentangle the effects of geography and observation noise to explain bimodal curves observed in Yap and New Caledonia. Moreover, although all data came from national surveillance systems, we had very little information about the potential degree

of under-reporting. Seroprevalence data were gathered from small sample sizes and were missing in New Caledonia, which leads to strong correlation between the observation rate and the fraction of the population involved in the epidemic. Because of the high proportion of asymptomatic or mildly symptomatic cases, the magnitude of the outbreaks is difficult to evaluate without precise seroprevalence data<sup>26</sup> or detection of mild, asymptomatic or pre-symptomatic infections.<sup>27</sup> Considering vectors, no demographic data were available and this partly explains the large variability of our  $R_0$  estimations.

Secondly, incidence and seroprevalence data were difficult to reconcile; the use of incidence data led to higher infection rates than those observed in the seroprevalence data. This difficulty has been overcome by considering that only a fraction of the population ( $\rho$ ) is involved in the epidemic and then our model manages to reproduce the observed seroprevalence rate. This exposed fraction could be the result of spatial heterogeneity and high clustering of cases and transmission, as observed for dengue. Finer scale incidence and seroprevalence data would be useful to explore this. Another explanation for higher predicted than observed infection rates could be due to interaction with other flaviviruses. The Zika outbreak was concomitant with dengue outbreaks in French Polynesia<sup>12;13</sup> and New Caledonia.<sup>15</sup> Examples of coinfection have been reported<sup>4</sup> but competition between these close pathogens may also have occurred. Finally, mathematical models with vectorial transmission may tend to estimate high attack rates, sometimes leading to a contradiction between observed incidence and observed seroprevalence. Assumptions on the proportionality between infected mosquitoes and the force of infection, as well as the density-dependence assumption in these models could be questioned. Indeed even if these assumptions are at the heart of the mathematical models of mosquito-borne pathogen transmission<sup>28;29</sup> a recent review,<sup>30</sup> and recent experimental results<sup>31;32</sup> question these important points.

On a final note, the estimates of  $R_0$  for ZIKV are similar to but generally on the lower side of estimates made for two other flaviviruses of medical importance, dengue and Yellow Fever

viruses<sup>33–35</sup>, even though caution is needed in the comparison of studies with differing models, methods and data sources. Interventions strategies developed for dengue should thus enable as, if not more effective control of ZIKV, with the caveat that ZIKV remains principally a mosquito-borne pathogen with little epidemiological significance of the sexual transmission route.

In conclusion, using state-of-the art stochastic modeling methods, we have been able to determine estimates of  $R_0$  for ZIKV with an unexpected relationship with population size. Further data from the current Zika epidemic in South America that is caused by the same lineage as French Polynesia will enable us to confirm this relationship. Our study highlights the importance of gathering seroprevalence data, especially for a virus that often leads to an asymptomatic outcome and it would provide a key component for precise quantitative analysis of pathogen propagation to enable improved planning and implementation of prevention and control strategies.

## Materials and methods

### Data

During the 2007 outbreak that struck Yap, 108 suspected or confirmed Zika cases (16 per 1,000 inhabitants) were reported by reviewing medical records and conducting prospective surveillance between April 1st and July 29th 2007.<sup>2</sup> In French Polynesia, sentinel surveillance recorded more than 8,700 suspected cases (32 per 1,000 inhabitants) across the whole territory between October 2013 and April 2014.<sup>12;13</sup> In New Caledonia, the first Zika case was imported from French Polynesia on 2013 November 12th. Approximately 2,500 cases (9 per 1,000 inhabitants) were reported through surveillance between January (first autochthonous case) and August 2014.<sup>15</sup>

For Yap and French Polynesia, the post-epidemic seroprevalence was assessed. In Yap, a household survey was conducted after the epidemic, yielding an infection rate in the island of 73%.<sup>2</sup> In French Polynesia, three seroprevalence studies were conducted. The first one took place before the Zika outbreak, and concluded that most of the population was naive for Zika virus.<sup>36</sup> The second seroprevalence survey was conducted between February and March 2014, at the end of the outbreak, and reported a seroprevalence rate around 49%.<sup>14</sup> The third one concerned only schoolchildren in Tahiti and was therefore not included in the present study.

Demographic data on population size were based on censuses from Yap<sup>2</sup>, French Polynesia<sup>37</sup>, and New Caledonia.<sup>38</sup>

## Models and inference

### Model equations

Although the models are simulated in a stochastic framework, we present them with ordinary differential equations for clarity. The reactions involved in the stochastic models are the same as those governed by the deterministic equations, but the simulation process differs through the use of discrete compartments. It is described in the next section.

The equations describing Pandey model are:



$$\begin{aligned}
 \frac{dH_S}{dt} &= -\beta_H v_I H_S \\
 \frac{dH_E}{dt} &= \beta_H v_I H_S - \sigma H_E \\
 \frac{dH_I}{dt} &= \sigma H_E - \gamma H_I \\
 \frac{dH_R}{dt} &= \gamma H_I \\
 \frac{dv_S}{dt} &= \mu - \frac{\beta_V H_I}{N} v_S - \mu v_S \\
 \frac{dv_E}{dt} &= \frac{\beta_V H_I}{N} v_S - \tau v_E - \mu v_E \\
 \frac{dv_I}{dt} &= \tau v_E - \mu v_I
 \end{aligned}$$

where  $v_S = \frac{V_S}{V}$  is the proportion of susceptible mosquitoes,  $v_E = \frac{V_E}{V}$  the proportion of exposed mosquitoes, and  $v_I = \frac{V_I}{V}$  the proportion of infected mosquitoes. Since we are using a discrete model, we cannot use directly the proportions  $v_S$ ,  $v_E$  and  $v_I$  whose values are smaller than one. Therefore, we rescale using  $V = H$ , which leads to  $V'_S = v_S \cdot H$ ,  $V'_E = v_E \cdot H$ , and  $V'_I = v_I \cdot H$ .

In this model, the force of infection for humans is  $\lambda_H = \beta_H v_I$ , and the force of infection for mosquitoes is  $\lambda_V = \beta_V \frac{H_I}{N}$

The equations describing Laneri model are:

$$\begin{aligned}\frac{dH_S}{dt} &= -\lambda H_S \\ \frac{dH_E}{dt} &= \lambda H_S - \sigma H_E \\ \frac{dH_I}{dt} &= \sigma H_E - \gamma H_I \\ \frac{dH_R}{dt} &= \gamma H_I \\ \frac{d\kappa}{dt} &= \frac{2\beta H_I \tau}{N} - 2\tau \kappa \\ \frac{d\lambda}{dt} &= 2\tau \kappa - 2\tau \lambda\end{aligned}$$

272 In this model, the role of mosquitoes in transmission is represented only through the  
273 delay they introduce during the extrinsic incubation period (EIP, incubation period in the  
274 mosquito). For modeling reasons, this delay is included by representing the force of  
275 infection from infected humans to susceptible humans with two compartments  $\kappa$  and  $\lambda$ :  
276 in this formalism, the duration between the moment when an exposed individual becomes  
277 infectious and the moment when another susceptible individual acquires the infection has a  
278 gamma distribution of mean  $\tau^{-1}$ . <sup>17;39;40</sup> Therefore,  $\lambda$  represents the current force of infection  
279 for humans  $\lambda_H = \lambda$ . The compartment  $\kappa$  represents the same force of infection but at a  
280 previous stage, reflecting the exposed phase for mosquitoes during the extrinsic incubation  
281 period. As an analogy to Pandey model, the force of infection for mosquitoes is  $\lambda_V = \frac{\beta H_I \tau}{v_s N}$ ,  
282 and therefore, the parameter  $\beta$  can be interpreted as the product of a transmission parameter  
283  $\beta'$  by the proportion of susceptible mosquitoes:  $\beta = v_s \beta'$ . The force of infection for  
284 mosquitoes is then similar to Pandey's:  $\lambda_V = \beta' \tau \frac{H_I}{N}$ .  
285 Again, since we are using a discrete model, we cannot use directly the proportions  $\lambda$  and  $\kappa$   
286 whose values are smaller than one. Therefore, we rescale up to a factor  $N$ , which leads to  
287  $L = \lambda N$  and  $K = \kappa N$ .

288

## Stochastic framework

Both models are simulated in a stochastic and discrete framework, the Poisson with stochastic rates formulation,<sup>18</sup> to include the uncertainties related to small population size. In this framework, the number of reactions occurring in a time interval  $dt$  is approximated by a multinomial distribution. In a model with  $m$  possible reactions and  $c$  compartments,  $z_t$  being the state of the system at time  $t$  and  $\theta$  the model parameters, the probability that each reaction  $r^k$  occurs  $n_k$  times in  $dt$  is calculated as follows:<sup>41</sup>

$$p(n_1, \dots, n_m | z_t, \theta) = \prod_{i=1}^c \left\{ M_i \left( 1 - \sum_{X(k)=i} p_k \right)^{\bar{n}_i} \prod_{X(k)=i} (p_k)^{n_k} \right\} + o(dt)$$

with,  $z_t^{(i)}$  being the number of individual in compartment  $i$  at time  $t$ ,

$$p_k = \left( 1 - \exp - \sum_{X(l)=i} r^l(z_t, \theta) z_t^{X(l)} dt \right) \frac{r^k(z_t, \theta)}{\sum_{X(l)=i} r^l(z_t, \theta)}$$

$$\bar{n}_i = z_t^{(i)} - \sum_{X(k)=i} n_k \text{ (the number of individuals staying in compartment } i \text{ in } dt)$$

$$M_i = \binom{z_t^{(i)}}{n_k}_{X(k)=i} \text{ (multinomial coefficient)}$$

## Observation models

The only observed compartments are the infected humans (incidence measured every week) and the recovered humans (seroprevalence at the end of the outbreak when data is available). In order to link the model to the data, two observation models, for both incidence and seroprevalence data, are needed.

### Observation model on incidence data

The observed weekly incidence is assumed to follow a negative binomial distribution<sup>18</sup> whose mean equals the number of new cases predicted by the model times an estimated observation rate  $r$ .

The observation rate  $r$  accounts for non observed cases, due to non reporting from medical centers, mild symptoms unseen by health system, and asymptomatic infections. Without additional data, it is not possible to make a distinction between these three categories of cases. We also implicitly make the assumption that these cases transmit the disease as much as reported symptomatic cases.

The observation model for incidence data is therefore :

$$Inc_{obs} = NegBin(\phi^{-1}, \frac{1}{1 + \phi r Inc})$$

$Inc_{obs}$  being the observed incidence, and  $Inc$  the incidence predicted by the model. The dispersion parameter<sup>18</sup>  $\phi$  is fixed at 0.1.

### Observation model on seroprevalence data

Seroprevalence data is fitted for Tahiti, Moorea, and Yap settings. It is assumed that the observed seroprevalence at the end of the epidemic follows a normal distribution with fixed standard deviation, whose mean equals the number of individuals in the  $H_R$  compartment predicted by the model.

The observation model for seroprevalence data is therefore :

$$H_R^{obs} = Normal(H_R, \Lambda)$$

at the last time step, with notations detailed for each model in Table 3.

| Island | Date       | Standard deviation | Observed seroprevalence                    |
|--------|------------|--------------------|--------------------------------------------|
|        |            | $\Lambda$          | $H_R^{obs}$                                |
| Yap    | 2007-07-29 | 150                | 5005 <sup>2</sup>                          |
| Moorea | 2014-03-28 | 325                | $0.49 \times 16200 = 7938$ <sup>14</sup>   |
| Tahiti | 2014-03-28 | 3562               | $0.49 \times 178100 = 87269$ <sup>14</sup> |

Table 3 – Details of the observation models for seroprevalence

### Prior distributions

Informative prior distributions are assumed for the mosquito lifespan, the duration of infectious period, and both intrinsic and extrinsic incubation periods. The initial numbers of infected mosquitoes and humans are estimated, and the initial number of exposed individuals is set to the initial number of infected to reduce parameter space. We assume that involved populations are naive to Zika virus prior to the epidemic and set the initial number of recovered humans to zero. The other priors and associated references are listed in Table 4.

| Parameters               |                                     | Pandey model                                  |               | Laneri model                               |                  | References               |
|--------------------------|-------------------------------------|-----------------------------------------------|---------------|--------------------------------------------|------------------|--------------------------|
| $R_0^2$                  | squared basic reproduction number   | Uniform[0, 20]                                |               | Uniform[0, 20]                             |                  | assumed                  |
| $\beta_V$                | transmission from human to mosquito | Uniform[0, 10]                                |               | .                                          |                  | assumed                  |
| $\gamma^{-1}$            | infectious period (days)            | Normal(5, 1) in [4, 7]                        |               | Normal(5, 1) in [4, 7]                     |                  | <a href="#">13</a>       |
| $\sigma^{-1}$            | intrinsic incubation period (days)  | Normal(4, 1) in [2, 7]                        |               | Normal(4, 1) in [2, 7]                     |                  | <a href="#">42–44</a>    |
| $\tau^{-1}$              | extrinsic incubation period (days)  | Normal(10.5, 1) in [4, 20]                    |               | Normal(10.5, 1) in [4, 20]                 |                  | <a href="#">45;46</a>    |
| $\mu^{-1}$               | mosquito lifespan (days)            | Normal(15, 2) in [4, 30]                      |               | .                                          |                  | <a href="#">47;48</a>    |
| $\rho$                   | fraction of population involved     | Uniform[0, 1]                                 |               | Uniform[0, 1]                              |                  |                          |
| Initial conditions (t=0) |                                     | Pandey model                                  |               | Laneri model                               |                  |                          |
| $H_{I\ 0}$               | Infected humans                     | $\text{Uniform}[10^{-6}, 1] \cdot N$          |               | $\text{Uniform}[10^{-6}, 1] \cdot N$       |                  |                          |
| $H_{E\ 0}$               | exposed humans                      | $H_{I\ 0}$                                    |               | $H_{I\ 0}$                                 |                  |                          |
| $H_{R\ 0}$               | Recovered humans                    | 0                                             |               | 0                                          |                  |                          |
|                          | Infected vectors                    | $V_{I0} = \text{Uniform}[10^{-6}, 1] \cdot H$ |               | $L_0 = \text{Uniform}[10^{-6}, 1] \cdot N$ |                  |                          |
|                          | exposed vectors                     | $V_{E\ 0} = V_{I\ 0}$                         |               | $K_0 = L_0$                                |                  |                          |
| Local conditions         |                                     | Yap                                           | Moorea        | Tahiti                                     | New Caledonia    | References               |
| r                        | Observation rate                    | Uniform[0, 1]                                 | Uniform[0, 1] | Uniform[0, 0.3]                            | Uniform[0, 0.23] | <a href="#">13;15;49</a> |
| H                        | Population size                     | 6,892                                         | 16,200        | 178,100                                    | 268,767          | <a href="#">2;37;38</a>  |

Table 4 – **Prior distributions of parameters.** "Uniform[0,20]" indicates a uniform distribution between in the range [0,20]. "Normal(5,1) in [4,7]" indicates a normal distribution with mean 5 and standard deviation 1, restricted to the range [4,7].

338 The range for the prior on observation rate is reduced for Tahiti and New Caledonia, in  
339 order to reduce the parameter space and facilitate convergence. In both cases, we use the  
340 information provided with the data source. In French Polynesia, 8,750 cases we reported,  
341 but according to local health authorities, more than 32,000 people would have attended  
342 health facilities for Zika<sup>13</sup> ( $8750/32000 \leq 0.3$ ). In New Caledonia, approximately 2,500  
343 cases were reported but more than 11,000 cases were estimated by health authorities<sup>49</sup>  
344 ( $2500/11000 \leq 0.23$ ). In both cases, these extrapolations are lower bounds on the real  
345 number of cases (in particular, they do not estimate the number of asymptomatic infections),  
346 and therefore can be used as upper bounds on the observation rate.

## 347 **Estimations**

### 348 **Inference with PMCMC**

349 The complete model is represented using the state space framework, with two equation  
 350 systems: the transition equations refer to the transmission models, and the measurement  
 351 equations are given by the observation models.

352

353 In a deterministic framework, this model could be directly estimated using MCMC, with a  
 354 Metropolis-Hastings algorithm targeting the posterior distribution of the parameters. This  
 355 algorithm would require the calculation of the model likelihood at each iteration.

356

357 In our stochastic framework, the model output is given only through simulations and the  
 358 likelihood is intractable. In consequence, estimations are performed with the PMCMC  
 359 algorithm (particle Markov Chain Monte Carlo<sup>11</sup>), in the PMMH version (particle marginal  
 360 Metropolis-Hastings). This algorithm uses the Metropolis-Hastings structure, but replaces  
 361 the real likelihood by its estimation with Sequential Monte Carlo (SMC).

---

**Algorithm 1** PMCMC<sup>11</sup> (PMMH version, as in SSM<sup>41</sup>)

---

In a model with  $n$  observations and  $J$  particles.

$q(\cdot|\theta^{(i)})$  is the transition kernel.

- 1: Initialize  $\theta^{(0)}$ .
  - 2: Using SMC algorithm, compute  $\hat{p}(y_{1:n}|\theta^{(0)})$  and sample  $x_{0:n}^*$  from  $\hat{p}(x_{0:n}|y_{1:n}, \theta^{(0)})$ .
  - 3: **for**  $i = 1 \dots N^\theta$  **do**
  - 4:   Sample  $\theta^*$  from  $q(\cdot|\theta^{(i)})$
  - 5:   Using SMC algorithm, compute  $L(\theta^*) = \hat{p}(y_{1:n}|\theta^*)$  and sample  $x_{0:n}^*$  from  $\hat{p}(x_{0:n}|y_{1:n}, \theta^*)$
  - 6:   Accept  $\theta^*$  (et  $x_{0:n}^*$ ) with probability  $1 \wedge \frac{L(\theta^{(i)})q(\theta^*)}{L(\theta^*)q(\theta^{(i)})}$
  - 7:   If accepted,  $\theta^{(i+1)} = \theta^*$  and  $x_{0:n}^{(i+1)} = x_{0:n}^*$ . Otherwise  $\theta^{(i+1)} = \theta^{(i)}$  and  $x_{0:n}^{(i+1)} = x_{0:n}^{(i)}$ .
  - 8: **end for**
- 

SMC<sup>50</sup> is a filtering method that enables to recover the latent variables and estimate the likelihood for a given set of parameters. The data is treated sequentially, by adding one more data point at each iteration. The initial distribution of the state variables is approximated by a sample a particles, and from one iteration to the next, all the particles are projected according to the dynamic given by the model. The particles receive a weight according to the quality of their prediction regarding the observations. Before the next iteration, all the particles are resampled using these weights, in order to eliminate low weight particles and concentrate the computational effort in high probability regions. Model likelihood is also computed sequentially at each iteration<sup>41;51</sup>.



---

**Algorithm 2** SMC (*Sequential Monte Carlo*, as implemented in SSM<sup>41</sup>)

---

In a model with  $n$  observations and  $J$  particles.

$L$  is the model likelihood  $p(y_{1:T}|\theta)$ .  $W_k^{(j)}$  is the weight and  $x_k^{(j)}$  is the state associated to particle  $j$  at iteration  $k$ .

```

1: Set  $L = 1$ ,  $W_0^{(j)} = 1/J$ .
2: Sample  $(x_0^{(j)})_{j=1:J}$  from  $p(x|\theta_0)$ .
3: for  $k = 0 : n - 1$  do
4:   for  $j = 0 : J$  do
5:     Sample  $(x_{k+1}^{(j)})_{j=1:J}$  from  $p(x_{k+1}|x_k, \theta)$ 
6:     Set  $\alpha^{(j)} = h(y_{k+1}, x_{k+1}^{(j)}, \theta)$ 
7:   end for
8:   Set  $W_{k+1}^{(j)} = \frac{\alpha^{(j)}}{\sum_{l=1}^J \alpha^{(l)}}$  and  $L = L \frac{1}{J} \sum_j \alpha^{(j)}$ 
9:   Resample  $(x_{0:k+1}^{(j)})_{j=1:J}$  from  $W_{k+1}^{(j)}$ 
10: end for

```

---

371 A gaussian kernel  $q(\cdot|\theta^{(i)})$  is used in the PMCMC algorithm, with mean  $\theta^{(i)}$  and fixed  
372 variance  $\Sigma^q$  (random walk Metropolis Hastings).

373 **Initialization**

374 PMCMC algorithm is very sensitive to initialization of both the parameter values  $\theta^{(0)}$  and  
375 the covariance matrix  $\Sigma^q$ . Several steps of initialization are therefore used.

376

377 Firstly, parameter values are initialized by maximum likelihood through simplex algorithm  
378 on a deterministic version of the model. We apply the simplex algorithm to a set of 1000  
379 points sampled in the prior distributions and we select the parameter set with the highest  
380 likelihood.

381

382 Secondly, in order to initialise the covariance matrix, an adaptative MCMC (Metropolis  
383 Hastings) framework is used<sup>41,52</sup>. It uses the empirical covariance of the chain  $\Sigma^{(i)}$ , and  
384 aims to calibrate the acceptance rate of the algorithm to an optimal value. The transition  
385 kernel is also mixed (with a probability  $\alpha = 0.05$ ) with another gaussian using the identity  
386 matrix to improve mixing properties.

387

$$q^A(.|x^{(i)}) = \alpha N(x^{(i)}, \lambda \frac{2.38^2}{d} Id) + (1 - \alpha) N(x^{(i)}, \frac{2.38^2}{d} \Sigma^{(i)})$$

388 The parameter  $\lambda$  is approximated by successive iterations using the empirical acceptance  
389 rate of the chain.

$$\lambda_{i+1} = \lambda_i a^i (AccRate_i - 0.234)$$

390

391

392 The adaptative PMCMC algorithm itself may have poor mixing properties without initialization.  
393 A first estimation of the covariance matrix is computed using KMCMC algorithm.<sup>41</sup>  
394 In the KMCMC algorithm, the model is simulated with stochastic differential equations  
395 (intermediate between deterministic and Poisson with stochastic rates frameworks) and the  
396 SMC part of the adaptative PMCMC is replaced by the extended Kalman filter. When  
397 convergence is reached with KMCMC, then, adaptative PMCMC is used.

398

399 The PMCMC algorithm is finally applied on the output of the adaptative PMCMC, using  
400 50,000 iterations and 10,000 particles. Calculations are performed with SSM software<sup>41</sup>  
401 and R version 3.2.2.

## 402 $R_0$ calculation

403  $R_0$  is calculated using the Next Generation Matrix approach<sup>9</sup> (NGM).

404

## 405 $R_0$ calculation in Pandey model

$$F = \begin{pmatrix} 0 & 0 & 0 & \beta_H \\ 0 & 0 & 0 & 0 \\ 0 & \beta_V & 0 & 0 \\ 0 & 0 & 0 & 0 \end{pmatrix} \quad V = \begin{pmatrix} -\sigma & 0 & 0 & 0 \\ \sigma & -\gamma & 0 & 0 \\ 0 & 0 & -(\mu + \tau) & 0 \\ 0 & 0 & \tau & -\mu \end{pmatrix}$$

406 Then we have,

$$V^{-1} = \begin{pmatrix} -1/\sigma & 0 & 0 & 0 \\ -1/\gamma & -1/\gamma & 0 & 0 \\ 0 & 0 & -1/(\mu + \tau) & 0 \\ 0 & 0 & -\tau/[\mu(\tau + \mu)] & -1/\mu \end{pmatrix}$$

407 and

$$FV^{-1} = \begin{pmatrix} 0 & 0 & -\beta_H\tau/[\mu(\tau + \mu)] & -\beta_H/\mu \\ 0 & 0 & 0 & 0 \\ -\beta_V/\gamma & -\beta_V/\gamma & 0 & 0 \\ 0 & 0 & 0 & 0 \end{pmatrix}$$

408 We calculate the eigen values  $\alpha$  of  $-FV^{-1}$  :

$$\begin{vmatrix} -\alpha & 0 & \beta_H\tau/[\mu(\tau+\mu)] & \beta_H/\mu \\ 0 & -\alpha & 0 & 0 \\ \beta_V/\gamma & \beta_V/\gamma & -\alpha & 0 \\ 0 & 0 & 0 & -\alpha \end{vmatrix} = \alpha^2 \left( \alpha^2 - \frac{\beta_H\beta_V\tau}{\gamma\mu(\tau+\mu)} \right) = 0$$

409 Then  $\alpha = 0$  or  $\alpha = \pm \sqrt{\frac{\beta_H\beta_V\tau}{\gamma\mu(\tau+\mu)}}$  and the highest eigen value is  $R_0 = \sqrt{\frac{\beta_H\beta_V\tau}{\gamma\mu(\tau+\mu)}}$ .

410

411 This formula defines  $R_0$  as "the number of secondary cases per generation"<sup>53</sup>: i.e  $R_0$  can be  
 412 written as the geometric mean  $R_0 = \sqrt{R_0^v R_0^h}$ , where  $R_0^v$  is the number of infected mosquitoes  
 413 after the introduction of one infected human in a naive population, and  $R_0^h$  is the number of  
 414 infected humans after the introduction of one infected mosquito in a naive population. With  
 415 this definition, herd immunity is reached when  $(1 - R_0^{-2})$  of the population is vaccinated<sup>53</sup>.

#### 416 $R_0$ calculation in Laneri model

417 Following the analogy with Pandey model, we compute the spectral radius of the NGM for  
 418 the Laneri model.

$$F = \begin{pmatrix} 0 & 0 & 0 & 1 \\ 0 & 0 & 0 & 0 \\ 0 & \beta\tau & 0 & 0 \\ 0 & 0 & 0 & 0 \end{pmatrix} \quad V = \begin{pmatrix} -\sigma & 0 & 0 & 0 \\ \sigma & -\gamma & 0 & 0 \\ 0 & 0 & -\tau & 0 \\ 0 & 0 & \tau & -\tau \end{pmatrix}$$

419 Then we have,

$$V^{-1} = \begin{pmatrix} -1/\sigma & 0 & 0 & 0 \\ -1/\gamma & -1/\gamma & 0 & 0 \\ 0 & 0 & -1/\tau & 0 \\ 0 & 0 & -1/\tau & -1/\tau \end{pmatrix}$$

420 and

$$FV^{-1} = \begin{pmatrix} 0 & 0 & -1/\tau & -1/\tau \\ 0 & 0 & 0 & 0 \\ -\beta\tau/\gamma & -\beta\tau/\gamma & 0 & 0 \\ 0 & 0 & 0 & 0 \end{pmatrix}$$

421 We calculate the eigen values  $\alpha$  of  $-FV^{-1}$  :

$$\begin{vmatrix} -\alpha & 0 & 1/\tau & 1/\tau \\ 0 & -\alpha & 0 & 0 \\ \beta\tau/\gamma & \beta\tau/\gamma & -\alpha & 0 \\ 0 & 0 & 0 & -\alpha \end{vmatrix} = \alpha^2 \left( \alpha^2 - \frac{\beta\tau}{\gamma\tau} \right) = 0$$

422 Then  $\alpha = 0$  or  $\alpha = \pm\sqrt{\frac{\beta}{\gamma}}$  and the highest eigen value is  $\alpha_R = \sqrt{\frac{\beta}{\gamma}}$ .

423

424 Because  $\lambda$  and  $\kappa$  can be seen as parameters rather than state variables, the interpretation of  
 425 the spectral radius as the  $R_0$  of the model is not straightforward. Therefore, we computed  
 426 the  $R_0$  of the model through simulations, by counting the number of secondary infections  
 427 after the introduction of a single infected individual in a naive population. Since Laneri  
 428 model is considered here as a vector model, the number of infected humans after the  
 429 introduction of a single infected is considered as  $R_0^2$ . We simulated 1000 deterministic

trajectories, using parameter values sampled in the posterior distributions for all parameters except initial conditions. With this method, the confidence intervals for number of infected humans ( $R_0^2$ ) are similar to the ones of  $\alpha_R^2$  estimated by the model. As a consequence,  $R_0$  was approximated by the spectral radius of the NGM in our results with our stochastic framework (cf. Table 5).

As a robustness check, the same method was applied to Pandey model : the confidence intervals for the number of secondary cases in simulations are very similar to the ones of  $R_0^2$  (cf. Table 5).

|               | Pandey model  | Laneri model  |
|---------------|---------------|---------------|
| Yap           | 3.1 (2.5-4.3) | 2.2 (1.9-2.6) |
| Moorea        | 2.6 (2.2-3.3) | 1.8 (1.6-2.0) |
| Tahiti        | 2.5 (2.0-3.3) | 1.6 (1.5-1.7) |
| New Caledonia | 2.0 (1.8-2.2) | 1.6 (1.5-1.7) |

Table 5 – **Square root of the number of secondary cases after the introduction of a single infected individual in a naive population.** Median and 95% credible intervals of 1000 deterministic simulations using parameters from the posterior distribution.

## Sensitivity analysis

In order to analyse the influence of parameter values on the model's outputs, a sensitivity analysis was performed, using LHS/PRCC technique<sup>54</sup>, on Tahiti example. Similar results were obtained for the other settings. Three criteria were retained as outputs for the analysis: the seroprevalence at the last time point, the intensity of the peak of the outbreak and the date of the peak. We used uniform distributions for all parameters, which are listed in Tables 6 and 7. For model parameters, we used the same range as for the prior distribution. For initial conditions, the observation rate  $r$  and the fraction involved in the epidemic  $\rho$ , we used the 95% confidence interval obtained by PMCMC, in order to avoid unrealistic scenarios.

449

| Parameters                              |                                    | Seroprevalence |         | Peak intensity |         | Peak date |         |
|-----------------------------------------|------------------------------------|----------------|---------|----------------|---------|-----------|---------|
|                                         | Distribution                       | PRCC           | p-value | PRCC           | p-value | PRCC      | p-value |
| Model parameters                        |                                    |                |         |                |         |           |         |
| $R_0^2$                                 | Uniform[0,20]                      | 0.88           | <0.001  | 0.91           | <0.001  | -0.53     | <0.001  |
| $\beta_V$                               | Uniform[0.1,10]                    | -0.69          | <0.001  | -0.77          | <0.001  | 0.29      | <0.001  |
| $\gamma^{-1}$                           | Uniform[4,7]                       | -0.25          | <0.001  | 0.09           | 0.003   | 0.20      | <0.001  |
| $\sigma^{-1}$                           | Uniform[2,7]                       | -0.03          | 0.324   | -0.12          | <0.001  | 0.18      | <0.001  |
| $\tau^{-1}$                             | Uniform[4,20]                      | 0.00           | 0.921   | -0.05          | 0.102   | 0.08      | 0.012   |
| $\mu^{-1}$                              | Uniform[4,30]                      | -0.61          | <0.001  | -0.75          | <0.001  | 0.51      | <0.001  |
| Initial conditions                      |                                    |                |         |                |         |           |         |
| $H_{i0}$                                | Uniform[ $2 \cdot 10^{-5}$ ,0.011] | -0.03          | 0.403   | -0.04          | 0.204   | 0.03      | 0.417   |
| $V_{i0}$                                | Uniform[ $10^{-4}$ ,0.034]         | 0.06           | 0.044   | -0.03          | 0.290   | -0.24     | <0.001  |
| Fraction involved and observation model |                                    |                |         |                |         |           |         |
| $\rho$                                  | Uniform[0.46,0.54]                 | 0.50           | <0.001  | 0.14           | <0.001  | -0.03     | 0.307   |
| $r$                                     | Uniform[0.048,0.072]               | 0.02           | 0.578   | 0.03           | 0.383   | 0.04      | 0.250   |

**Table 6 – Sensitivity analysis in Pandey model. Tahiti island.** 1000 parameter sets were sampled with latin hypercube sampling (LHS), using "lhs" R package<sup>55</sup>. On each parameter set, the model was simulated deterministically. PRCC were computed using the "sensitivity" R package.<sup>56</sup> P-values were calculated using the Student distribution approximation provided by Blower and Dowlatabadi.<sup>54</sup>

450 For all criteria, the key parameters in both models are transmission parameters ( $R_0$  and  $\beta_V$ ).

451 High values for  $R_0$  are positively correlated with a large seroprevalence and a high and early

452 peak. On the contrary, high values for the parameters introducing a delay in the model, the

453 incubation periods in human ( $\sigma^{-1}$ ) and in mosquito ( $\tau^{-1}$ ), are associated with a lower and

454 later peak, and have no significant effect on seroprevalence. Moreover, the simulations are

455 clearly sensitive to the other model parameters, in particular the mosquito lifespan ( $\mu^{-1}$ ) in

456 Pandey model.

457 Concerning other parameters, the initial conditions have a noticeable effect on the date

458 of the peak only. As expected, the fraction involved in the epidemic ( $\rho$ ) influences the

459 magnitude of the outbreak, by calibrating the proportion of people than can be infected, but

460 it has no significant effect on the timing of the peak.

461

| Parameters                              |                                    | Seroprevalence |         | Peak intensity |         | Peak date |         |
|-----------------------------------------|------------------------------------|----------------|---------|----------------|---------|-----------|---------|
|                                         | Distribution                       | PRCC           | p-value | PRCC           | p-value | PRCC      | p-value |
| Model parameters                        |                                    |                |         |                |         |           |         |
| $R_0^2$                                 | Uniform[0,20]                      | 0.62           | <0.001  | 0.93           | <0.001  | -0.50     | <0.001  |
| $\gamma^{-1}$                           | Uniform[4,7]                       | 0.01           | 0.731   | 0.62           | <0.001  | 0.15      | <0.001  |
| $\sigma^{-1}$                           | Uniform[2,7]                       | -0.03          | 0.373   | -0.54          | <0.001  | 0.21      | <0.001  |
| $\tau^{-1}$                             | Uniform[4,20]                      | -0.03          | 0.323   | -0.70          | <0.001  | 0.47      | <0.001  |
| Initial conditions                      |                                    |                |         |                |         |           |         |
| $H_{i0}$                                | Uniform[ $10^{-5}$ ,0.015]         | 0.05           | 0.135   | 0.02           | 0.622   | -0.32     | <0.001  |
| $L_0$                                   | Uniform[ $2 \cdot 10^{-5}$ ,0.004] | 0.05           | 0.133   | 0.00           | 0.930   | -0.16     | <0.001  |
| Fraction involved and observation model |                                    |                |         |                |         |           |         |
| $\rho$                                  | Uniform[0.49,0.59]                 | 0.80           | <0.001  | 0.34           | <0.001  | 0.02      | 0.558   |
| $r$                                     | Uniform[0.048,0.068]               | -0.01          | 0.727   | 0.01           | 0.738   | -0.02     | 0.635   |

**Table 7 – Sensitivity analysis in Laneri model. Tahiti island.** 1000 parameter sets were sampled with latin hypercube sampling (LHS), using "lhs" R package<sup>55</sup>. On each parameter set, the model was simulated deterministically. PRCC were computed using the "sensitivity" R package.<sup>56</sup> P-values were calculated using the Student distribution approximation provided by Blower and Dowlatabadi.<sup>54</sup>

## 462 Complementary results

463 These complementary results include PMCMC results for both models in the four settings:  
 464 the epidemic trajectories regarding the human compartments for infected and recovered  
 465 individuals (Figures 4-5), the detailed posterior distributions for all parameters (Figures  
 466 6-13) and correlation plots for all models (Figures 14-21).

467



## 468 Infected and recovered

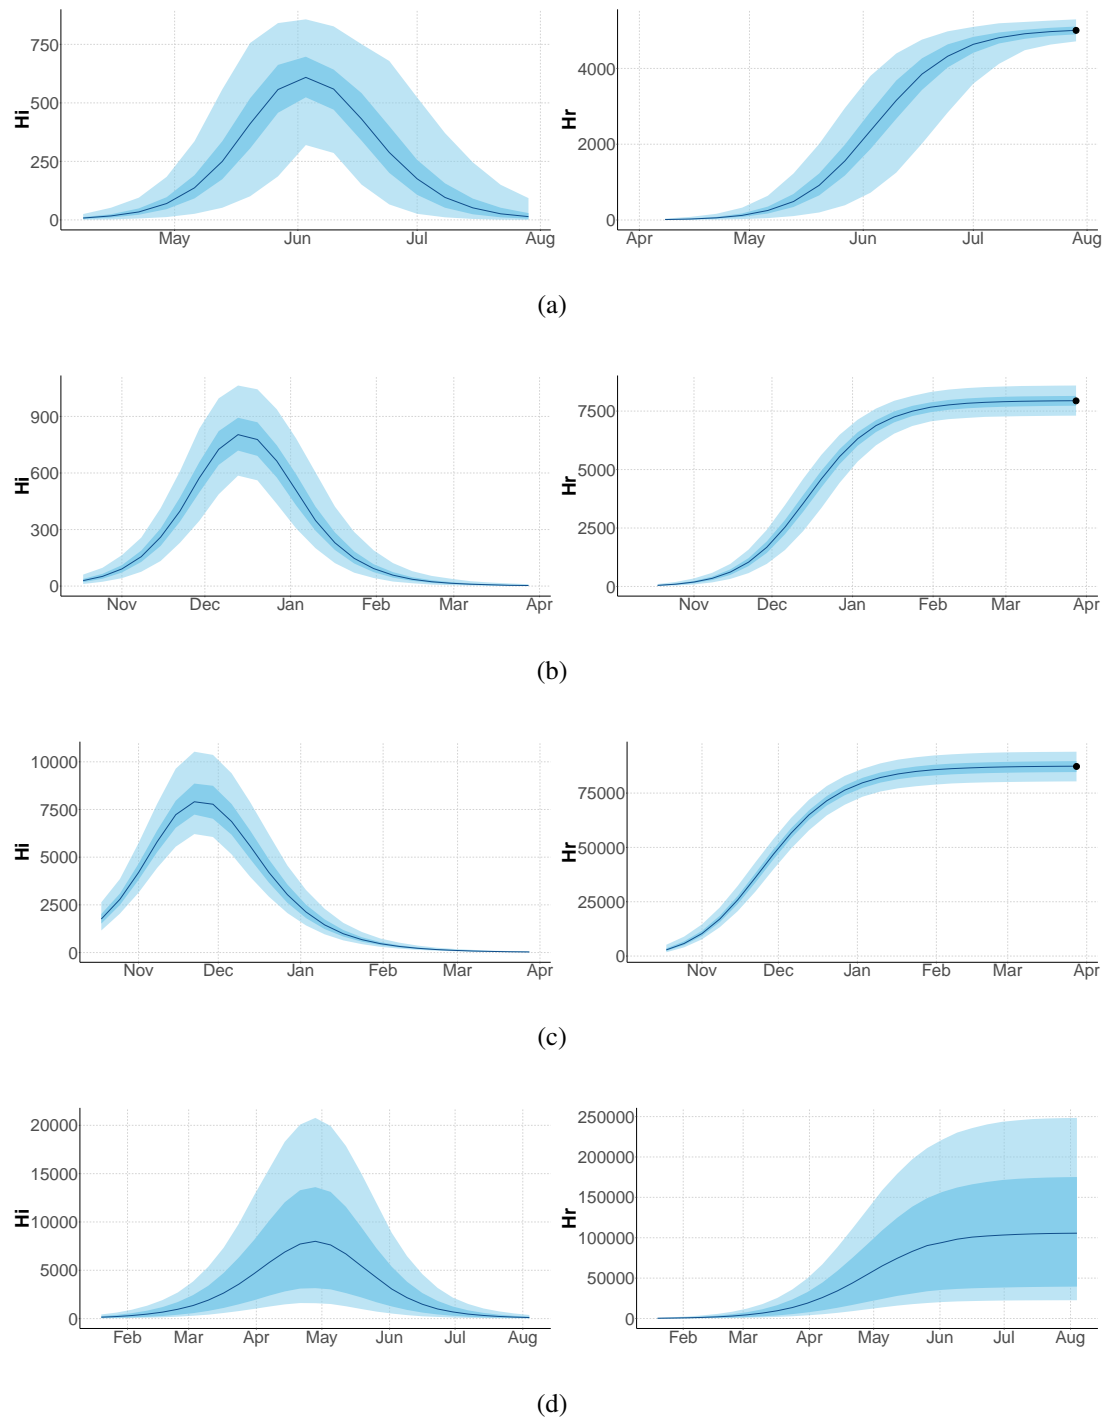

**Figure 4 – Infected and recovered humans evolution during the outbreak with Pandey model.** Simulations from the posterior density: posterior median (solid line), 95% and 50% credible intervals (shaded blue areas) and observed seroprevalence (black dots). First column: Infected humans ( $H_I$ ). Second column: Recovered humans ( $H_R$ ). a) Yap. b) Moorea. c) Tahiti. d) New Caledonia.

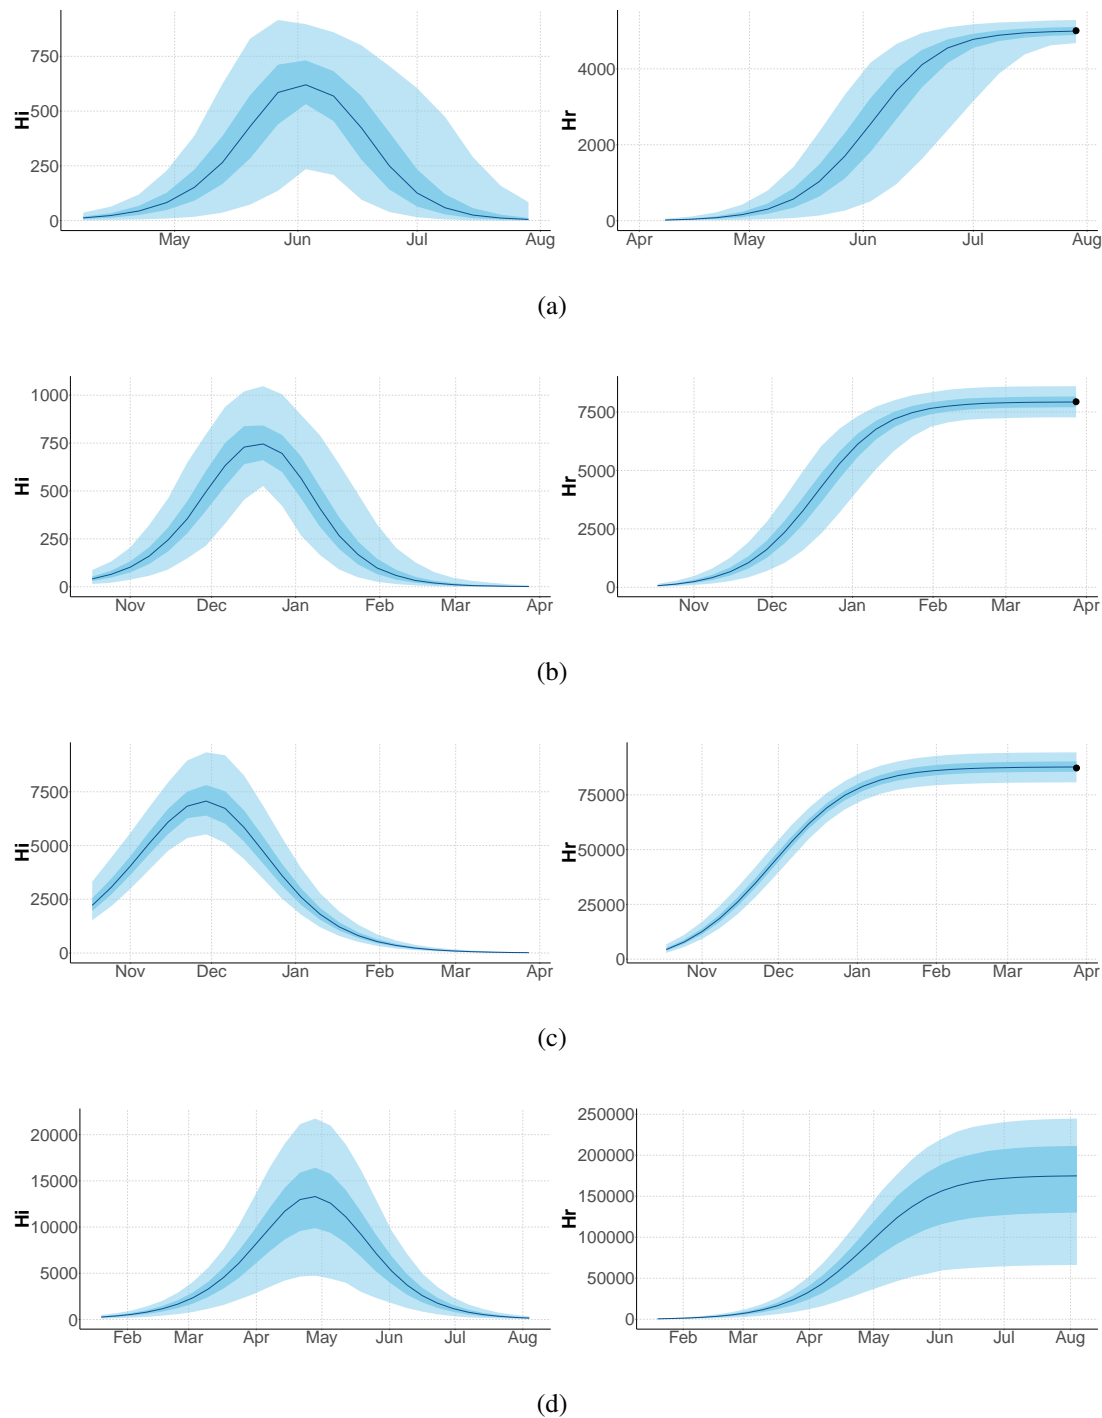

**Figure 5 – Infected and recovered humans evolution during the outbreak with Laneri model.** Simulations from the posterior density: posterior median (solid line), 95% and 50% credible intervals (shaded blue areas) and observed seroprevalence (black dots). First column: Infected humans ( $H_I$ ). Second column: Recovered humans ( $H_R$ ). a) Yap. b) Moorea. c) Tahiti. d) New Caledonia.

## 469 Posterior distributions

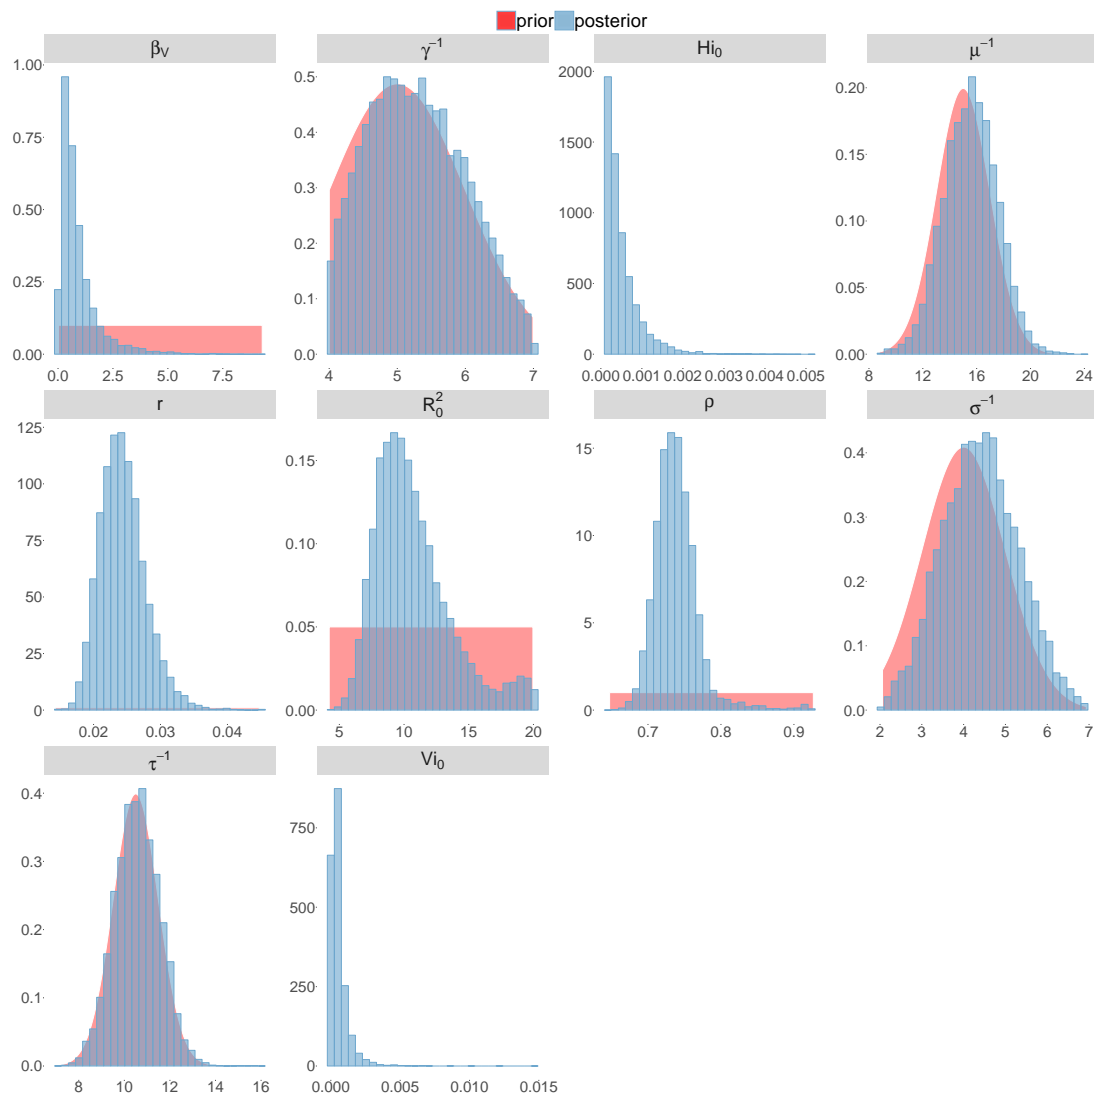

Figure 6 – Posterior distributions. Pandey model, Yap island.

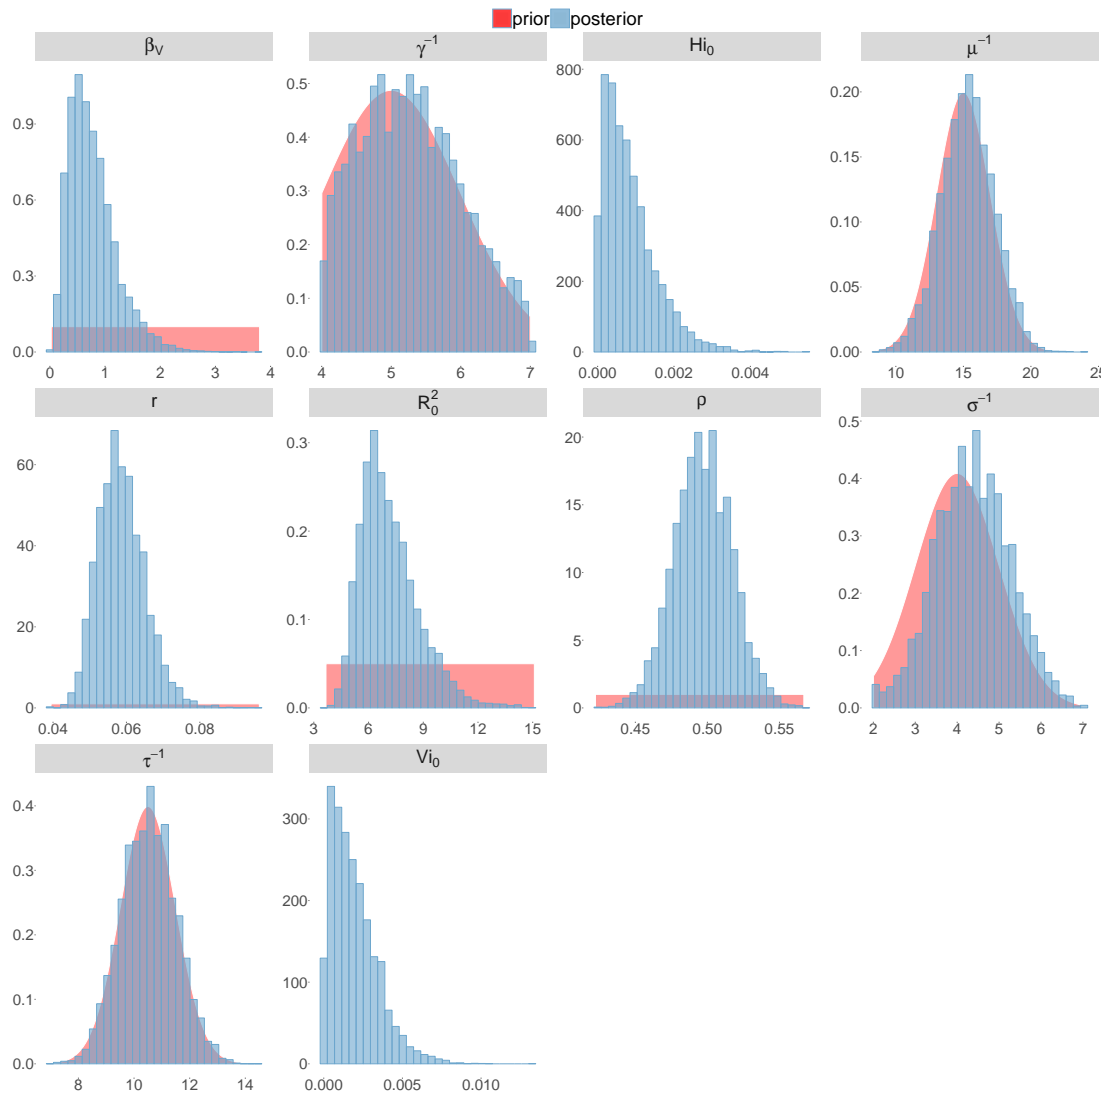

Figure 7 – Posterior distributions. Pandey model, Moorea island.

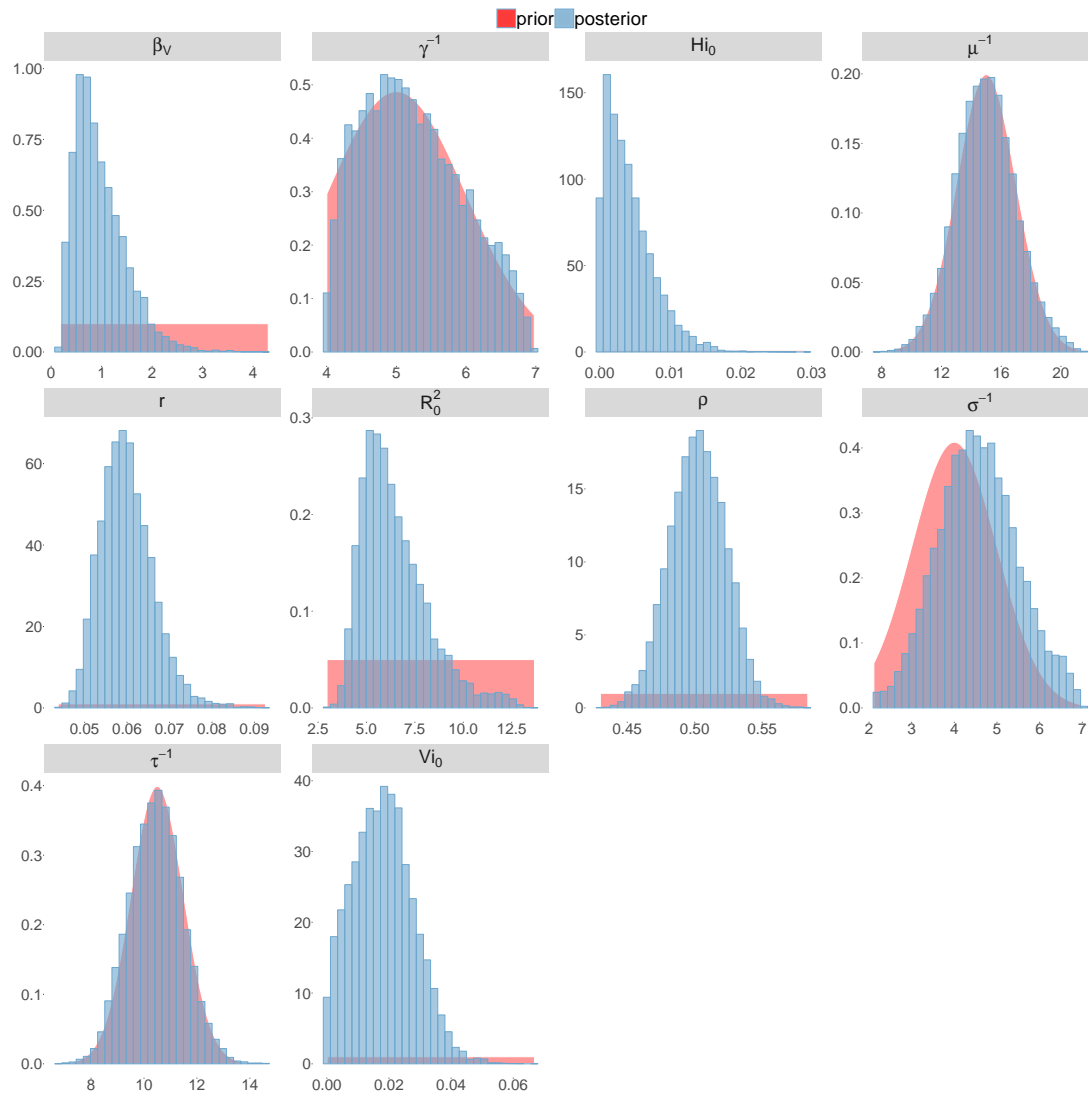

Figure 8 – Posterior distributions. Pandey model, Tahiti island.

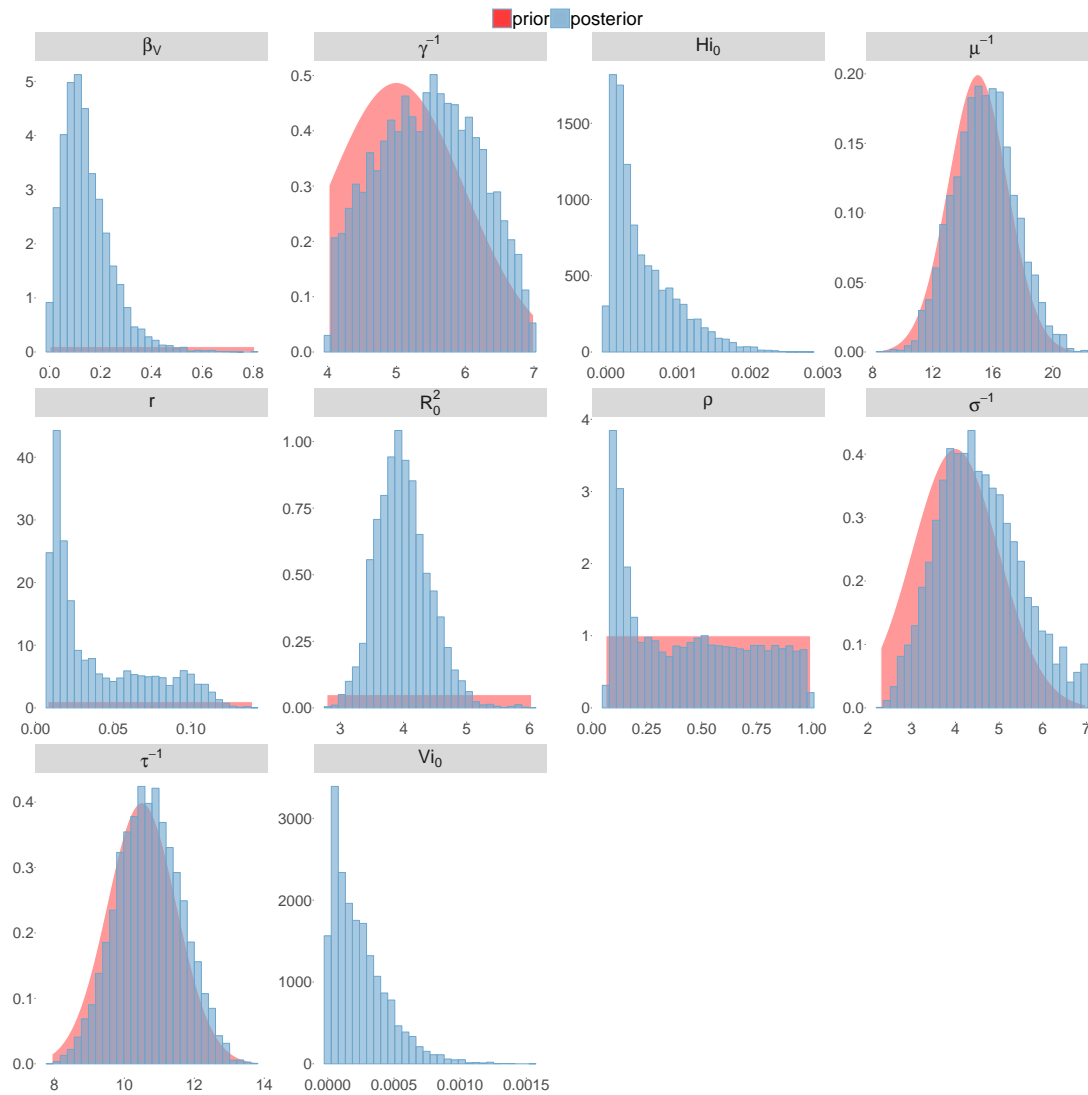

Figure 9 – Posterior distributions. Pandey model, New Caledonia.

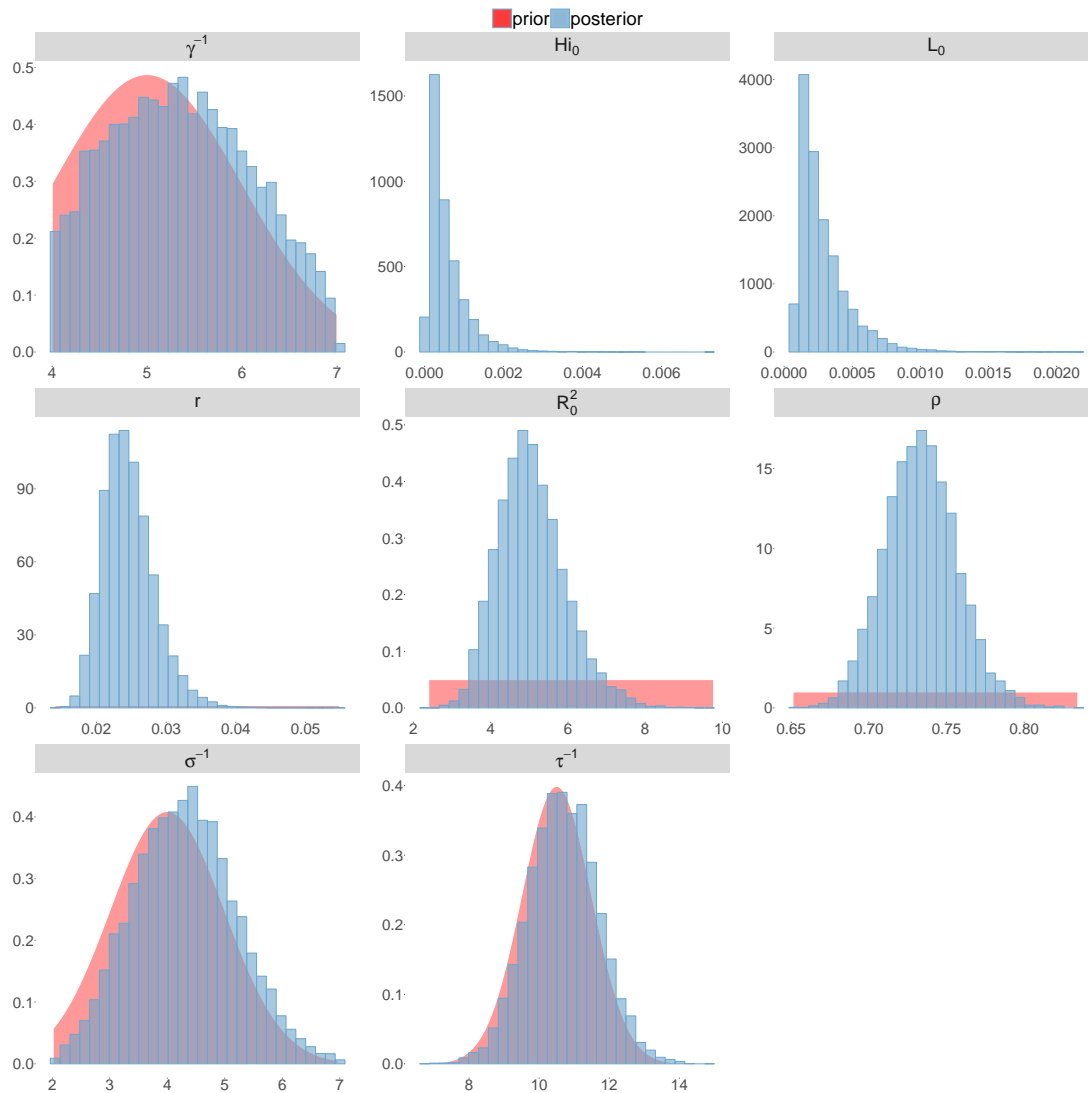

Figure 10 – Posterior distributions. Laneri model, Yap island.

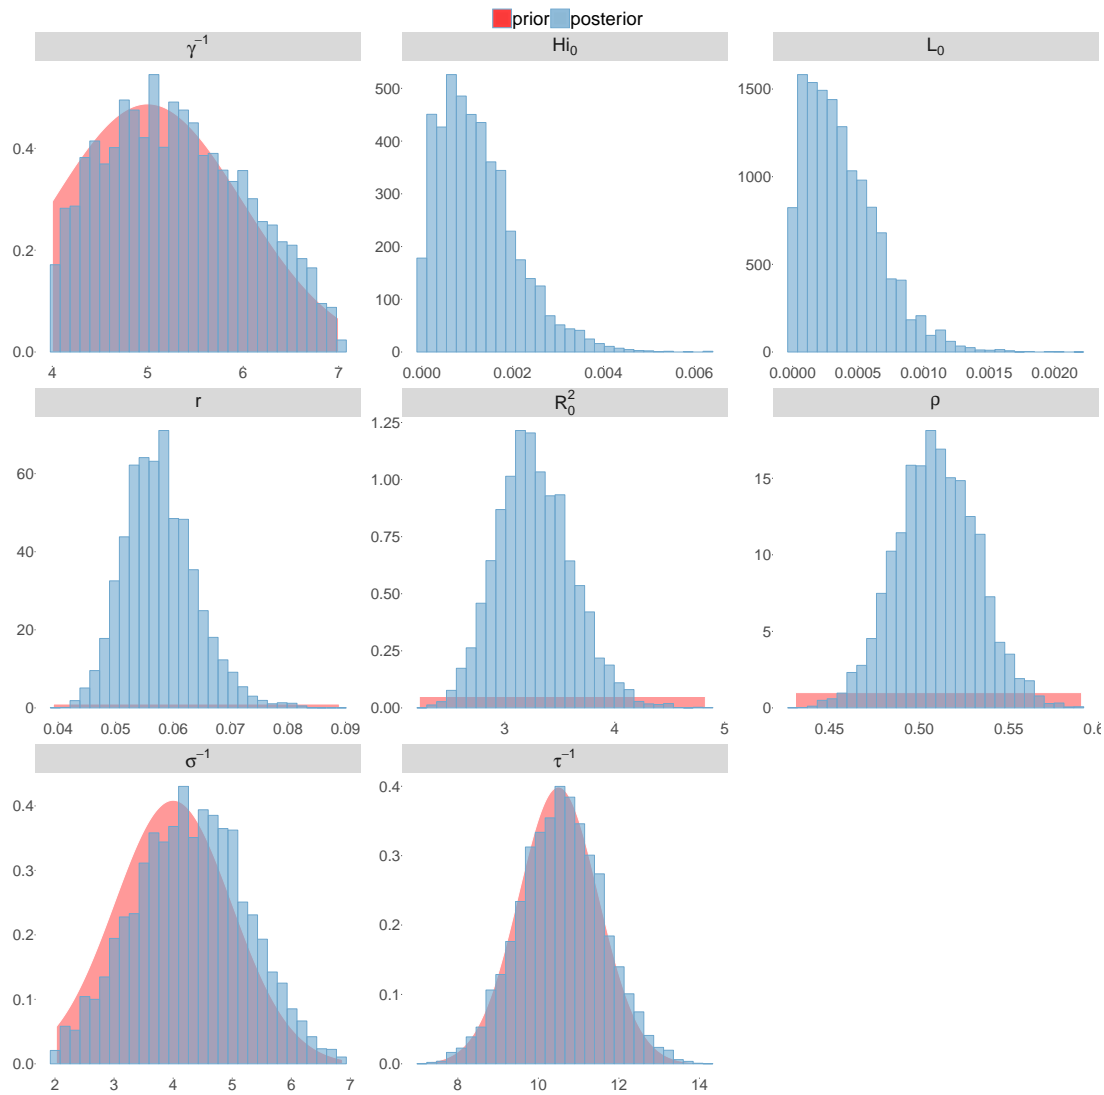

Figure 11 – Posterior distributions. Laneri model, Moorea island.



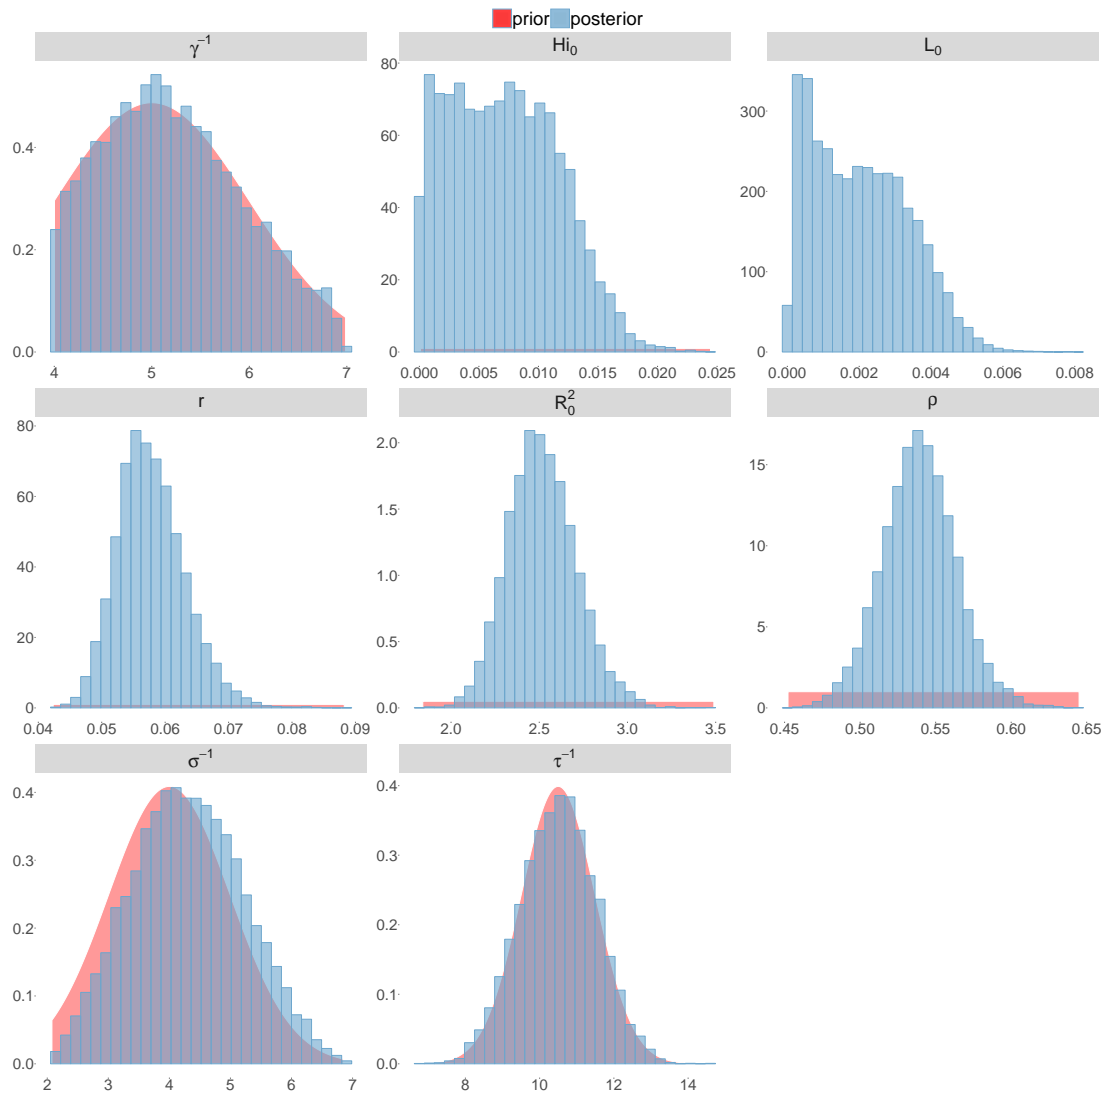

Figure 12 – Posterior distributions. Laneri model, Tahiti island.

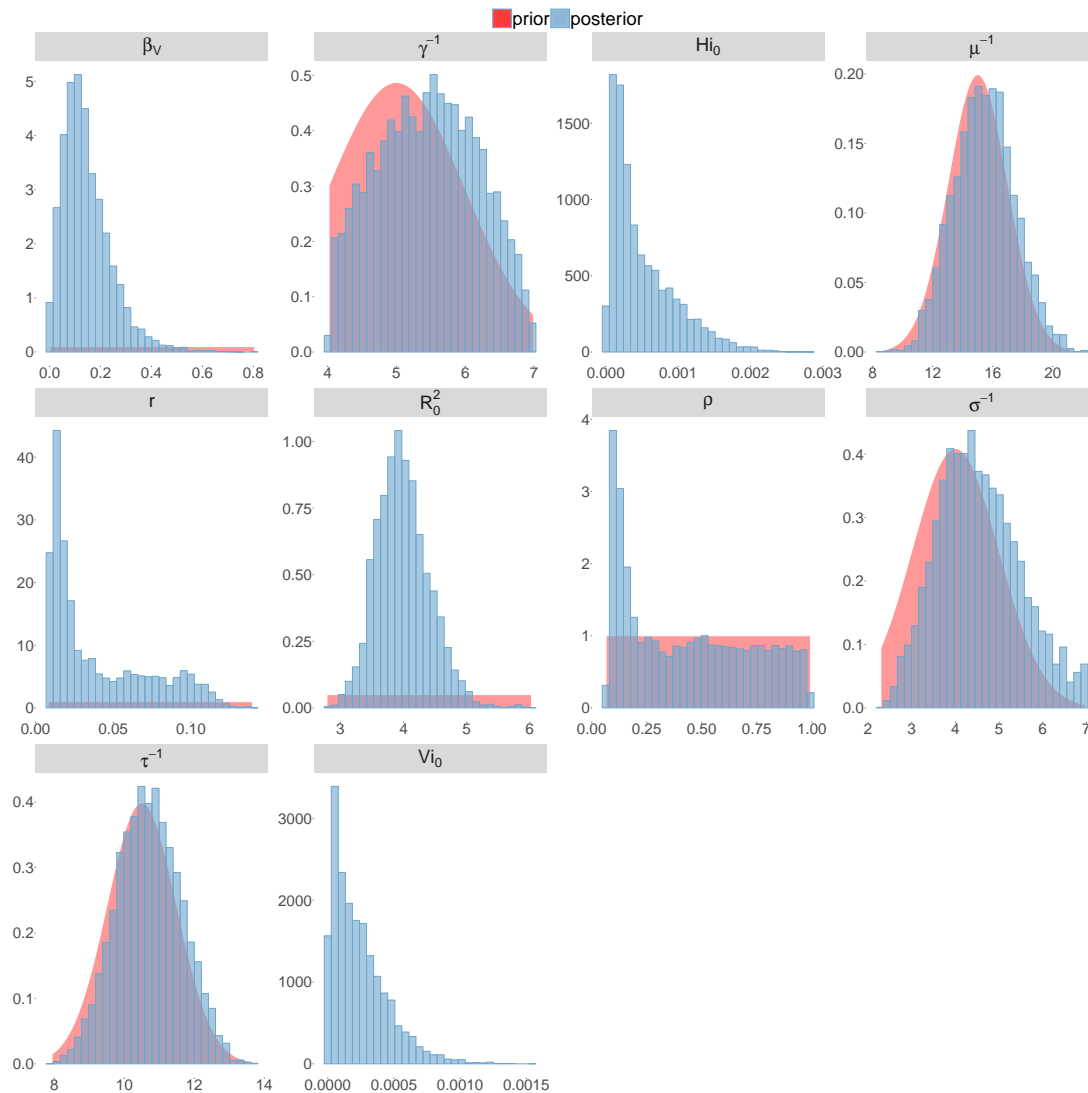

Figure 13 – Posterior distributions. Laneri model, New Caledonia.

## Correlation between estimated parameters

The marginal posterior densities (Figures 6-13) do not indicate the correlation between parameters, i.e when the observed value of one parameter is highly influenced by the value of another one. In some cases, this phenomenon reveals identifiability issues : the model manages to estimate only a pair of parameters but cannot identify each one separately. In our case, the observation rate and the fraction of the population involved in the epidemic are strongly negatively correlated when no information is provided on seroprevalence (Figures 9 and 13).

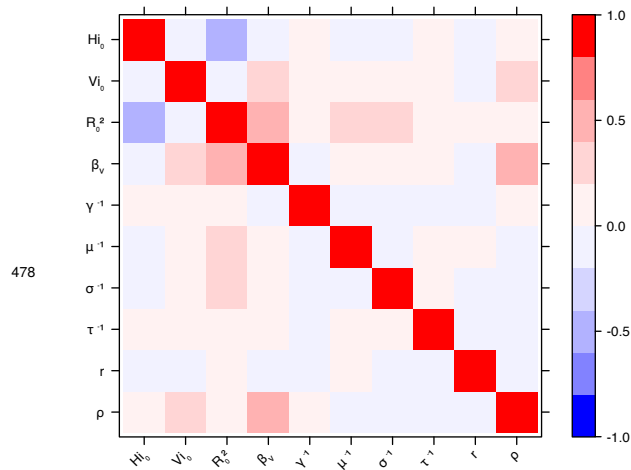

Figure 14 – Correlation plot of MCMC output. Pandey model, Yap island.

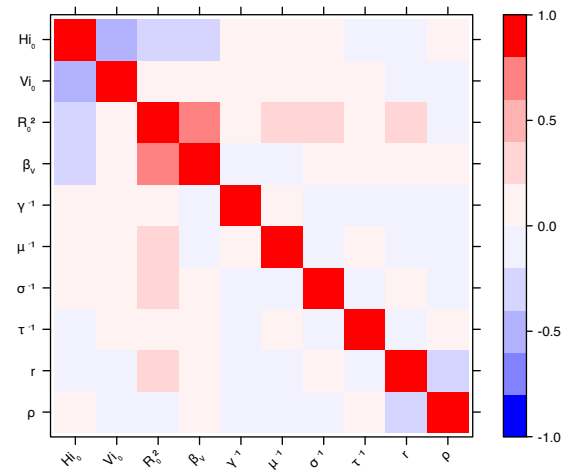

Figure 15 – Correlation plot of MCMC output. Pandey model, Moorea island.

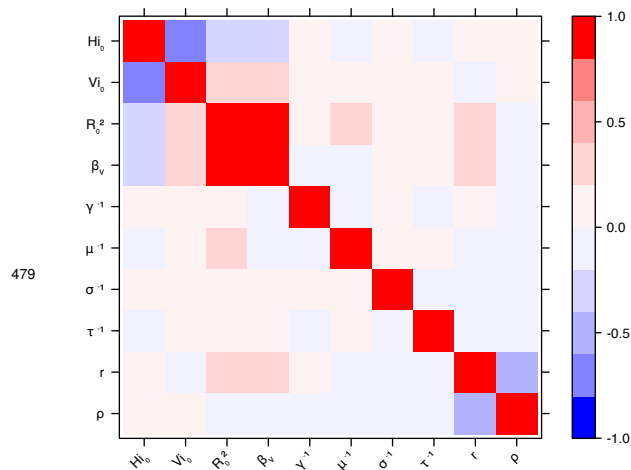

Figure 16 – Correlation plot of MCMC output. Pandey model, Tahiti island.

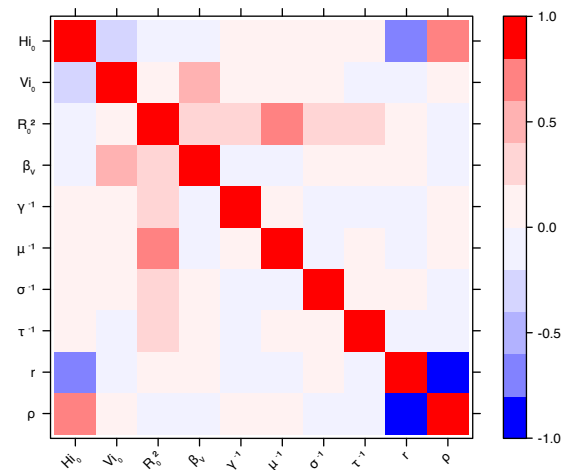

Figure 17 – Correlation plot of MCMC output. Pandey model, New Caledonia.

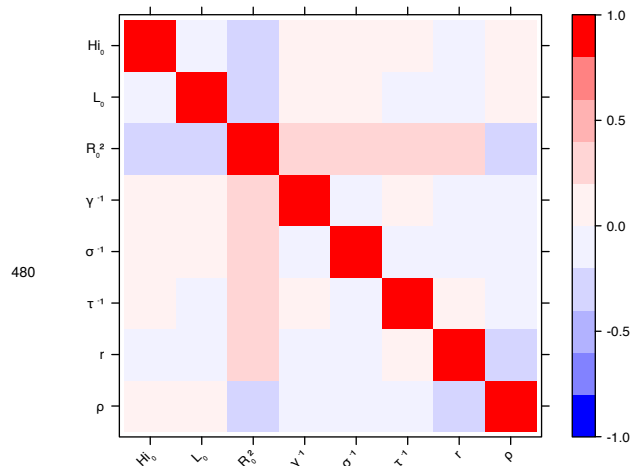

Figure 18 – Correlation plot of MCMC output. Laneri model, Yap island.

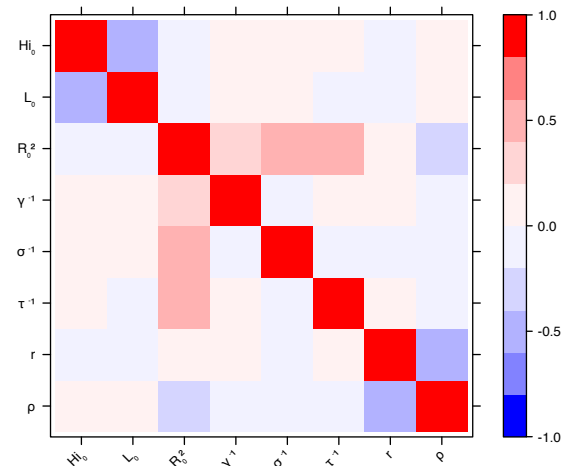

Figure 19 – Correlation plot of MCMC output. Laneri model, Moorea island.

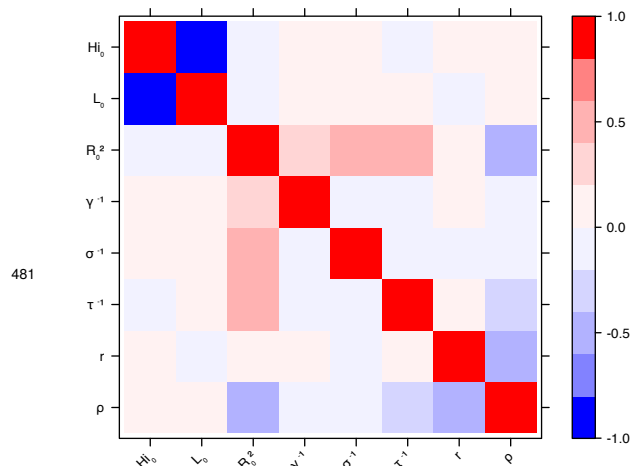

Figure 20 – Correlation plot of MCMC output. Laneri model, Tahiti island.

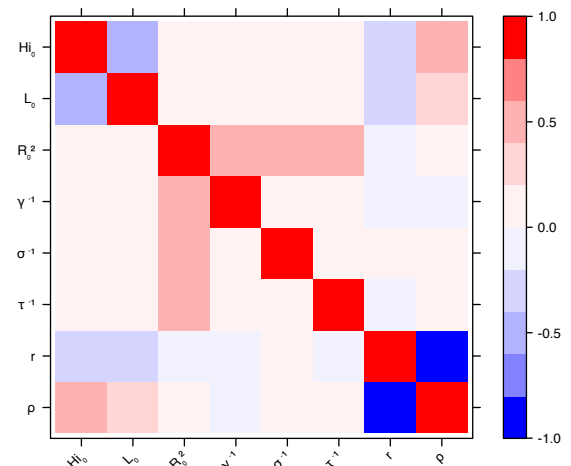

Figure 21 – Correlation plot of MCMC output. Laneri model, New Caledonia.

## Acknowledgments

CC, DGS and BC are partially supported by the "Pépinière interdisciplinaire Eco-Evo-Devo" from the Centre National de la Recherche Scientifique (CNRS). The research leading to

## REFERENCES

## REFERENCES

these results has also received funding from the European Commission Seventh Framework Program [FP7/ 2007-2013] for the DENFREE project under Grant Agreement n° 282 378. The funders played no role in the study design, data collection, analysis, or preparation of the manuscript.

## Contributors

CC and BC designed the study, CC, DGS and BC contributed to the numerical part of the study, and all the authors participated in the interpretation of the results and in the writing of the manuscript.

## Declaration of interests

The authors have declared that no competing interests exist.

## References

[1] WHO | WHO statement on the first meeting of the International Health Regulations (2005) (IHR 2005) Emergency Committee on Zika virus and observed increase in neurological disorders and neonatal malformations;. Available from: <http://www.who.int/mediacentre/news/statements/2016/1st-emergency-committee-zika/en/> [accessed 2016-06-09].

[2] Duffy MR, Chen TH, Hancock WT, Powers AM, Kool JL, Lanciotti RS, et al. Zika virus outbreak on Yap Island, federated states of Micronesia. *New England Journal of Medicine*. 2009;360(24):2536–2543. Available from: <http://www.nejm.org/doi/full/10.1056/NEJMoa0805715> [accessed 2016-02-22].

[3] Cao-Lormeau VM, Roche C, Teissier A, Robin E, Berry AL, Mallet HP, et al. Zika

## REFERENCES

## REFERENCES

- 506 Virus, French Polynesia, South Pacific, 2013. *Emerging Infectious Diseases*. 2014  
507 Jun;20(6):1084–1086. Available from: [http://wwwnc.cdc.gov/eid/article/20/6/14-0138\\_](http://wwwnc.cdc.gov/eid/article/20/6/14-0138_article.htm)  
508 [article.htm](http://wwwnc.cdc.gov/eid/article/20/6/14-0138_article.htm) [accessed 2016-05-23]. doi:10.3201/eid2006.140138.
- 509 [4] Dupont-Rouzeyrol M, O'Connor O, Calvez E, Daurès M, John M, Grangeon  
510 JP, et al. Co-infection with Zika and Dengue Viruses in 2 Patients, New  
511 Caledonia, 2014. *Emerging Infectious Diseases*. 2015 Feb;21(2):381–382. Available  
512 from: <http://www.ncbi.nlm.nih.gov/pmc/articles/PMC4313662/> [accessed 2016-04-04].  
513 doi:10.3201/eid2102.141553.
- 514 [5] Petersen LR, Jamieson DJ, Powers AM, Honein MA. Zika Virus. *New England*  
515 *Journal of Medicine*. 2016 Apr;374(16):1552–1563. Available from: [http://dx.doi.org/](http://dx.doi.org/10.1056/NEJMra1602113)  
516 [10.1056/NEJMra1602113](http://dx.doi.org/10.1056/NEJMra1602113) [accessed 2016-05-23]. doi:10.1056/NEJMra1602113.
- 517 [6] Musso D, Gubler DJ. Zika Virus. *Clinical Microbiology Reviews*. 2016  
518 Jan;29(3):487–524. Available from: <http://cmr.asm.org/content/29/3/487> [accessed  
519 2016-05-12]. doi:10.1128/CMR.00072-15.
- 520 [7] Cao-Lormeau VM, Blake A, Mons S, Lastère S, Roche C, Vanhomwegen J,  
521 et al. Guillain-Barré Syndrome outbreak associated with Zika virus infection  
522 in French Polynesia: a case-control study. *The Lancet*. 2016 Feb;387(10027).  
523 Available from: <http://linkinghub.elsevier.com/retrieve/pii/S0140673616005626> [accessed  
524 2016-05-19]. doi:10.1016/S0140-6736(16)00562-6.
- 525 [8] Schuler-Faccini L, Ribeiro EM, Feitosa IML, Horovitz DDG, Cavalcanti DP,  
526 Pessoa A, et al. Possible Association Between Zika Virus Infection and  
527 Microcephaly — Brazil, 2015. *MMWR Morbidity and Mortality Weekly Report*. 2016  
528 Jan;65(3):59–62. Available from: [http://www.cdc.gov/mmwr/volumes/65/wr/mm6503e2.](http://www.cdc.gov/mmwr/volumes/65/wr/mm6503e2.htm)  
529 [htm](http://www.cdc.gov/mmwr/volumes/65/wr/mm6503e2.htm) [accessed 2016-05-23]. doi:10.15585/mmwr.mm6503e2.
- 530 [9] Diekmann O, Heesterbeek JaP, Roberts MG. The construction of next-generation

## REFERENCES

## REFERENCES

- matrices for compartmental epidemic models. *Journal of The Royal Society Interface*.  
2010 Jun;7(47):873–885. Available from: <http://rsif.royalsocietypublishing.org/content/7/47/873> [accessed 2016-05-12]. doi:10.1098/rsif.2009.0386.
- [10] van den Driessche P, Watmough J. Reproduction numbers and sub-threshold endemic equilibria for compartmental models of disease transmission. *Mathematical Biosciences*. 2002 Dec;180:29–48.
- [11] Andrieu C, Doucet A, Holenstein R. Particle markov chain monte carlo methods. *Journal of the Royal Statistical Society: Series B (Statistical Methodology)*. 2010;72(3):269–342. Available from: <http://onlinelibrary.wiley.com/doi/10.1111/j.1467-9868.2009.00736.x/full> [accessed 2015-02-12].
- [12] Centre d’hygiène et de salubrité publique. Bulletin de la dengue et du zika en Polynésie française; 2014. Available from: [http://www.hygiene-publique.gov.pf/IMG/pdf/bulletin\\_dengue\\_28-03-14.pdf](http://www.hygiene-publique.gov.pf/IMG/pdf/bulletin_dengue_28-03-14.pdf) [accessed 2016-05-12].
- [13] Mallet HP, Vial AL, Musso D. Bilan de l’épidémie à virus Zika en Polynésie française. *Bulletin d’Informations Sanitaires Epidemiologiques et Statistiques*. 2015 May;(13). Available from: [http://www.hygiene-publique.gov.pf/IMG/pdf/no13\\_-\\_mai\\_2015\\_-\\_zika.pdf](http://www.hygiene-publique.gov.pf/IMG/pdf/no13_-_mai_2015_-_zika.pdf) [accessed 2016-05-12].
- [14] Aubry M, Teissier A, Roche C, Teururai S, Desprès P, Mallet HP, et al.. Serosurvey of dengue, Zika and other mosquito-borne viruses in French Polynesia, abstr 765. Philadelphia, PA; 2015. Available from: <http://www.abstractsonline.com/Plan/ViewAbstract.aspx?sKey=2e5199c4-aceb-4d61-8769-342586917c5a&cKey=74ffe328-3a83-4f28-84c6-5656971501c8&mKey=%7bAB652FDF-0111-45C7-A5E5-0BA9D4AF5E12%7d> [accessed 2016-05-17].
- [15] Direction des Affaires Sanitaires et Sociales. Situation sanitaire en Nouvelle Calédonie.

## REFERENCES

## REFERENCES

- 555 Les arboviroses : dengue, chikungunya, zika; 2014. Available from: <http://www.dass.gouv.nc/portal/page/portal/dass/librairie/fichiers/32142267.PDF> [accessed 2016-05-27].
- 556
- 557 [16] Pandey A, Mubayi A, Medlock J. Comparing vector–host and SIR models  
558 for dengue transmission. *Mathematical Biosciences*. 2013 Dec;246(2):252–259.  
559 Available from: <http://linkinghub.elsevier.com/retrieve/pii/S0025556413002435> [accessed  
560 2015-03-09]. doi:10.1016/j.mbs.2013.10.007.
- 561 [17] Laneri K, Bhadra A, Ionides EL, Bouma M, Dhiman RC, Yadav RS, et al. Forcing  
562 Versus Feedback: Epidemic Malaria and Monsoon Rains in Northwest India. *PLoS*  
563 *Computational Biology*. 2010 Sep;6(9). Available from: [http://dx.plos.org/10.1371/](http://dx.plos.org/10.1371/journal.pcbi.1000898)  
564 [journal.pcbi.1000898](http://dx.plos.org/10.1371/journal.pcbi.1000898) [accessed 2015-01-27]. doi:10.1371/journal.pcbi.1000898.
- 565 [18] Bretó C, He D, Ionides EL, King AA. Time series analysis via  
566 mechanistic models. *The Annals of Applied Statistics*. 2009 Mar;3(1):319–348.  
567 Available from: <http://projecteuclid.org/euclid.aoas/1239888373> [accessed 2015-09-08].  
568 doi:10.1214/08-AOAS201.
- 569 [19] Anderson RM, May RM. Directly transmitted infections diseases: control  
570 by vaccination. *Science*. 1982 Feb;215(4536):1053–1060. Available  
571 from: <http://science.sciencemag.org/content/215/4536/1053> [accessed 2016-05-23].  
572 doi:10.1126/science.7063839.
- 573 [20] Wang L, Valderramos S, Wu A, Ouyang S, Li C, Brasil P, et al. From  
574 Mosquitos to Humans: Genetic Evolution of Zika Virus. *Cell Host & Microbe*.  
575 2016 May;19(5):561–565. Available from: [http://linkinghub.elsevier.com/retrieve/pii/](http://linkinghub.elsevier.com/retrieve/pii/S1931312816301421)  
576 [S1931312816301421](http://linkinghub.elsevier.com/retrieve/pii/S1931312816301421) [accessed 2016-06-02]. doi:10.1016/j.chom.2016.04.006.
- 577 [21] Ledermann JP, Guillaumot L, Yug L, Saweyog SC, Tided M, Machieng P, et al. Aedes  
578 hensilli as a Potential Vector of Chikungunya and Zika Viruses. *PLOS Negl Trop Dis*.



## REFERENCES

## REFERENCES

- 2014 Oct;8(10):e3188. Available from: <http://journals.plos.org/plosntds/article?id=10.1371/journal.pntd.0003188> [accessed 2016-05-27]. doi:10.1371/journal.pntd.0003188.
- [22] Kucharski AJ, Funk S, Eggo RM, Mallet HP, Edmunds WJ, Nilles EJ. Transmission Dynamics of Zika Virus in Island Populations: A Modelling Analysis of the 2013-14 French Polynesia Outbreak. *PLOS Negl Trop Dis*. 2016 May;10(5):e0004726. Available from: <http://journals.plos.org/plosntds/article?id=10.1371/journal.pntd.0004726> [accessed 2016-05-19]. doi:10.1371/journal.pntd.0004726.
- [23] Funk S, Kucharski AJ, Camacho A, Eggo RM, Yakob L, Edmunds WJ. Comparative analysis of dengue and Zika outbreaks reveals differences by setting and virus; 2016. biorxiv;043265v3. Available from: <http://biorxiv.org/lookup/doi/10.1101/043265> [accessed 2016-04-14].
- [24] Nishiura H, Kinoshita R, Mizumoto K, Yasuda Y, Nah K. Transmission potential of Zika virus infection in the South Pacific. *International Journal of Infectious Diseases*. 2016 Apr;45:95–97. Available from: <http://www.ijidonline.com/article/S1201971216000370/abstract> [accessed 2016-04-27]. doi:10.1016/j.ijid.2016.02.017.
- [25] Cazelles B, Hales S. Infectious Diseases, Climate Influences, and Nonstationarity. *PLOS Med*. 2006 Aug;3(8):e328. Available from: <http://journals.plos.org/plosmedicine/article?id=10.1371/journal.pmed.0030328> [accessed 2016-05-24]. doi:10.1371/journal.pmed.0030328.
- [26] Metcalf CJE, Farrar J, Cutts FT, Basta NE, Graham AL, Lessler J, et al. Use of serological surveys to generate key insights into the changing global landscape of infectious disease. *The Lancet*. 2016 Apr; Available from: <http://linkinghub.elsevier.com/retrieve/pii/S0140673616301647> [accessed 2016-05-10]. doi:10.1016/S0140-6736(16)30164-7.
- [27] Thompson RN, Gilligan CA, Cuniffe NJ. Detecting Presymptomatic

## REFERENCES

## REFERENCES

- 604 Infection Is Necessary to Forecast Major Epidemics in the Earliest Stages of  
605 Infectious Disease Outbreaks. *PLOS Comput Biol.* 2016 Apr;12(4):e1004836.  
606 Available from: [http://journals.plos.org/ploscompbiol/article?id=10.1371/journal.pcbi.](http://journals.plos.org/ploscompbiol/article?id=10.1371/journal.pcbi.1004836)  
607 [1004836](http://journals.plos.org/ploscompbiol/article?id=10.1371/journal.pcbi.1004836) [accessed 2016-05-12]. doi:10.1371/journal.pcbi.1004836.
- 608 [28] Reiner RC, Perkins TA, Barker CM, Niu T, Chaves LF, Ellis AM, et al.  
609 A systematic review of mathematical models of mosquito-borne pathogen  
610 transmission: 1970-2010. *Journal of The Royal Society Interface.* 2013  
611 Feb;10(81):20120921–20120921. Available from: [http://rsif.royalsocietypublishing.org/](http://rsif.royalsocietypublishing.org/cgi/doi/10.1098/rsif.2012.0921)  
612 [cgi/doi/10.1098/rsif.2012.0921](http://rsif.royalsocietypublishing.org/cgi/doi/10.1098/rsif.2012.0921) [accessed 2016-05-24]. doi:10.1098/rsif.2012.0921.
- 613 [29] Smith DL, Perkins TA, Reiner RC, Barker CM, Niu T, Chaves LF, et al. Recasting the  
614 theory of mosquito-borne pathogen transmission dynamics and control. *Transactions*  
615 *of The Royal Society of Tropical Medicine and Hygiene.* 2014 Jan;108(4):185–197.  
616 Available from: <http://trstmh.oxfordjournals.org/content/108/4/185> [accessed 2016-05-24].  
617 doi:10.1093/trstmh/tru026.
- 618 [30] Halstead SB. Dengue Virus–Mosquito Interactions. *Annual Review of Entomology.*  
619 2008;53(1):273–291. Available from: [http://dx.doi.org/10.1146/annurev.ento.53.103106.](http://dx.doi.org/10.1146/annurev.ento.53.103106.093326)  
620 [093326](http://dx.doi.org/10.1146/annurev.ento.53.103106.093326) [accessed 2016-05-24]. doi:10.1146/annurev.ento.53.103106.093326.
- 621 [31] Bowman LR, Runge-Ranzinger S, McCall PJ. Assessing the Relationship  
622 between Vector Indices and Dengue Transmission: A Systematic Review of the  
623 Evidence. *PLOS Negl Trop Dis.* 2014 May;8(5):e2848. Available from: [http://](http://journals.plos.org/plosntds/article?id=10.1371/journal.pntd.0002848)  
624 [journals.plos.org/plosntds/article?id=10.1371/journal.pntd.0002848](http://journals.plos.org/plosntds/article?id=10.1371/journal.pntd.0002848) [accessed 2016-05-24].  
625 doi:10.1371/journal.pntd.0002848.
- 626 [32] Harrington LC, Fleisher A, Ruiz-Moreno D, Vermeulen F, Wa CV, Poulson RL,  
627 et al. Heterogeneous feeding patterns of the dengue vector, *Aedes aegypti*, on

## REFERENCES

## REFERENCES

- individual human hosts in rural Thailand. *PLoS neglected tropical diseases*. 2014 Aug;8(8):e3048. doi:10.1371/journal.pntd.0003048.
- [33] Favier C, Degallier N, Rosa-Freitas MG, Boulanger JP, Costa Lima JR, Luitgards-Moura JF, et al. Early determination of the reproductive number for vector-borne diseases: the case of dengue in Brazil. *Tropical Medicine and International Health*. 2006 Mar;11(3):332–340. Available from: <http://doi.wiley.com/10.1111/j.1365-3156.2006.01560.x>. doi:10.1111/j.1365-3156.2006.01560.x.
- [34] Imai N, Dorigatti I, Cauchemez S, Ferguson NM. Estimating Dengue Transmission Intensity from Sero-Prevalence Surveys in Multiple Countries. *PLoS Neglected Tropical Diseases*. 2015 Apr;9(4). Available from: <http://www.ncbi.nlm.nih.gov/pmc/articles/PMC4400108/>. doi:10.1371/journal.pntd.0003719.
- [35] Massad E, Burattini MN, Coutinho FAB, Lopez LF. Dengue and the risk of urban yellow fever reintroduction in Sao Paulo State, Brazil. *Revista de Saúde Pública*. 2003;37(4):477–484. Available from: [http://www.scielo.br/scielo.php?pid=S0034-89102003000400013&script=sci\\_arttext&tlng=es](http://www.scielo.br/scielo.php?pid=S0034-89102003000400013&script=sci_arttext&tlng=es).
- [36] Aubry M, Finke J, Teissier A, Roche C, Broult J, Paulous S, et al. Seroprevalence of arboviruses among blood donors in French Polynesia, 2011–2013. *International Journal of Infectious Diseases*. 2015 Dec;41:11–12. Available from: <http://www.sciencedirect.com/science/article/pii/S1201971215002398> [accessed 2016-03-07]. doi:10.1016/j.ijid.2015.10.005.
- [37] Institut National de la Statistique et des Etudes Economiques. Populations légales au recensement de la population 2012 de Polynésie française;. Available from: [http://www.insee.fr/fr/themes/detail.asp?ref\\_id=populegalescom&page=recensement/populegalescom/polynesie.htm](http://www.insee.fr/fr/themes/detail.asp?ref_id=populegalescom&page=recensement/populegalescom/polynesie.htm) [accessed 2016-05-12].
- [38] Institut National de la Statistique et des Etudes Economiques. Populations légales

## REFERENCES

## REFERENCES

- 653 au recensement de la population 2014 de Nouvelle-Calédonie;. Available  
654 from: [http://www.insee.fr/fr/themes/detail.asp?ref\\_id=populegalescom&page=recensement/  
655 populegalescom/nouvelle\\_caledonie.htm](http://www.insee.fr/fr/themes/detail.asp?ref_id=populegalescom&page=recensement/populegalescom/nouvelle_caledonie.htm) [accessed 2016-05-12].
- 656 [39] Roy M, Bouma MJ, Ionides EL, Dhiman RC, Pascual M. The Potential Elimination of  
657 Plasmodium vivax Malaria by Relapse Treatment: Insights from a Transmission Model  
658 and Surveillance Data from NW India. *PLOS Negl Trop Dis*. 2013 Jan;7(1):e1979.  
659 Available from: <http://journals.plos.org/plosntds/article?id=10.1371/journal.pntd.0001979>.  
660 doi:10.1371/journal.pntd.0001979.
- 661 [40] Lloyd AL. Destabilization of epidemic models with the inclusion of realistic  
662 distributions of infectious periods. *Proceedings Biological Sciences / The Royal  
663 Society*. 2001 May;268(1470):985–993. doi:10.1098/rspb.2001.1599.
- 664 [41] Dureau J, Ballesteros S, Bogich T. SSM: Inference for time series analysis with State  
665 Space Models; 2013. Available from: [https://github.com/JDureau/ssm/blob/master/doc/  
666 doc.pdf](https://github.com/JDureau/ssm/blob/master/doc/doc.pdf) [accessed 2015-03-27].
- 667 [42] Nishiura H, Mizumoto K, Villamil-Gómez WE, Rodríguez-Morales AJ. Preliminary  
668 estimation of the basic reproduction number of Zika virus infection during Colombia  
669 epidemic, 2015–2016. *Travel Medicine and Infectious Disease*. 2016 Apr;0(0).  
670 Available from: [http://www.travelmedicinejournal.com/article/S1477893916300084/abstract  
671 \[accessed 2016-04-27\]. doi:10.1016/j.tmaid.2016.03.016.](http://www.travelmedicinejournal.com/article/S1477893916300084/abstract)
- 672 [43] Bearcroft WGC. Zika virus infection experimentally induced in a human volunteer.  
673 *Transactions of The Royal Society of Tropical Medicine and Hygiene*. 1956  
674 Jan;50(5):442–448. Available from: [http://trstmh.oxfordjournals.org/content/50/5/442  
675 \[accessed 2016-05-12\]. doi:10.1016/0035-9203\(56\)90091-8.](http://trstmh.oxfordjournals.org/content/50/5/442)
- 676 [44] Lessler J, Ott C, Carcelen A, Konikoff J, Williamson J, Bi Q, et al. Times to key  
677 events in the course of Zika infection and their implications: a systematic review

## REFERENCES

## REFERENCES

- and pooled analysis. *Bull World Health Organ [Internet]*. 2016; Available from: [http://www.who.int/entity/bulletin/online\\_first/BLT.16.174540.pdf?ua=1](http://www.who.int/entity/bulletin/online_first/BLT.16.174540.pdf?ua=1) [accessed 2016-05-12].
- [45] Hayes EB. Zika Virus Outside Africa. *Emerging Infectious Diseases*. 2009 Sep;15(9):1347–1350. Available from: [http://wwwnc.cdc.gov/eid/article/15/9/09-0442\\_article.htm](http://wwwnc.cdc.gov/eid/article/15/9/09-0442_article.htm) [accessed 2016-02-22]. doi:10.3201/eid1509.090442.
- [46] Chouin-Carneiro T, Vega-Rua A, Vazeille M, Yebakima A, Girod R, Goindin D, et al. Differential Susceptibilities of *Aedes aegypti* and *Aedes albopictus* from the Americas to Zika Virus. *PLOS Negl Trop Dis*. 2016 Mar;10(3):e0004543. Available from: <http://journals.plos.org/plosntds/article?id=10.1371/journal.pntd.0004543> [accessed 2016-03-07]. doi:10.1371/journal.pntd.0004543.
- [47] Brady OJ, Johansson MA, Guerra CA, Bhatt S, Golding N, Pigott DM, et al. Modelling adult *Aedes aegypti* and *Aedes albopictus* survival at different temperatures in laboratory and field settings. *Parasites & Vectors*. 2013;6:351. doi:10.1186/1756-3305-6-351.
- [48] Liu-Helmersson J, Stenlund H, Wilder-Smith A, Rocklöv J. Vectorial Capacity of *Aedes aegypti*: Effects of Temperature and Implications for Global Dengue Epidemic Potential. *PLoS ONE*. 2014 Mar;9(3):e89783. Available from: <http://dx.plos.org/10.1371/journal.pone.0089783> [accessed 2016-05-13]. doi:10.1371/journal.pone.0089783.
- [49] Direction des Affaires Sanitaires et Sociales. Point sur la situation épidémiologique et les mesures sanitaires; 2014. Available from: <http://www.gouv.nc/portal/pls/portal/docs/1/28032255.PDF> [accessed 2016-05-12].
- [50] Doucet A, Freitas N, Gordon N, editors. Sequential Monte Carlo Methods in Practice. New York, NY: Springer New York; 2001. Available from: <http://link.springer.com/10.1007/978-1-4757-3437-9> [accessed 2016-05-20].

## REFERENCES

## REFERENCES

- [51] Doucet A, Johansen AM. A tutorial on particle filtering and smoothing: fifteen years later; 2011.
- [52] Roberts GO, Rosenthal JS. Examples of Adaptive MCMC. *Journal of Computational and Graphical Statistics*. 2009 Jan;18(2):349–367. Available from: <http://dx.doi.org/10.1198/jcgs.2009.06134> [accessed 2015-05-18]. doi:10.1198/jcgs.2009.06134.
- [53] Dietz K. The estimation of the basic reproduction number for infectious diseases. *Statistical methods in medical research*. 1993;2(1):23–41. Available from: <http://smm.sagepub.com/content/2/1/23.short>.
- [54] Blower SM, Dowlatabadi H. Sensitivity and Uncertainty Analysis of Complex Models of Disease Transmission: An HIV Model, as an Example. *International Statistical Review / Revue Internationale de Statistique*. 1994;62(2):229–243. Available from: <http://www.jstor.org/stable/1403510>. doi:10.2307/1403510.
- [55] Carnell R, Carnell MR, RUnit, Suggests. Package ‘lhs’. . 2016; Available from: <http://cran.stat.auckland.ac.nz/web/packages/lhs/lhs.pdf>.
- [56] Pujol G, Iooss B, Janon A. Package ‘sensitivity’; 2016. Available from: <https://cran.r-project.org/web/packages/sensitivity/sensitivity.pdf>.
